# Supplementary material for: A ciprofloxacin derived task specific ionic liquid as a highly selective extractant of thorium versus uranium
Source: Royal Society of Chemistry journal article supplement (doi:10.1039/d4ta06496h), 2024-01-01
Supplement: d4ta06496h1.pdf [file d4ta06496h1.pdf]

## Supporting Information

# Ciprofloxacin derived task specific ionic liquid as highly selective extractant of thorium *versus* uranium

David Lledó,<sup>a</sup> Guillermo Grindlay,<sup>b</sup> H. Q. Nimal Gunaratne,<sup>c</sup> Abel de Cózar,<sup>d,e</sup>

Ana Sirvent,<sup>f</sup> and José M. Sansano.<sup>f\*</sup>

<sup>a</sup> Medalchemistry, S. L. Ancha de Castelar, 46-48, entlo. A. San Vicente del Raspeig, 03690-Alicante (Spain).

<sup>b</sup> Department of Analytical Chemistry, Nutrition and Food Sciences, University of Alicante, PO Box 99, 03080 Alicante, Spain.

<sup>c</sup> The QUILL Research Centre, School of Chemistry and Chemical Engineering, the Queen's University of Belfast, Stranmillis Road, Belfast, Northern Ireland, BT9 5AG, UK.

<sup>d</sup> Departamento de Química Orgánica I/Kimika Organikoa I Saila, Facultad de Química/Kimika Fakultatea, Universidad del País Vasco/Euskal Herriko Unibertsitatea (UPV/EHU) and Donostia International Physics Center (DIPC), and Centro de Innovación en Química Avanzada (ORFEO-CINQA) P. K, 1072, 20018 San Sebastián-Donostia, Spain

<sup>e</sup> Ikerbasque, Basque Foundation for Science, Plaza Euskadi 5, 48009, Bilbao, Spain

<sup>f</sup> Departamento de Química Orgánica, Centro de Innovación en Química Avanzada (ORFEO-CINQA) and Institute of Organic Synthesis. Universidad de Alicante. Ctra. Alicante-San Vicente s/n, 03080-Alicante, Spain.

## Contents:

|                                                                                                                          |     |
|--------------------------------------------------------------------------------------------------------------------------|-----|
| 1. General remarks .....                                                                                                 | S2  |
| 2. Synthetic procedures and characterization data for compounds <b>2</b> , <b>3</b> and <b>4</b> .....                   | S2  |
| 3. <sup>1</sup> H-, <sup>19</sup> F and <sup>13</sup> C-NMR spectra for compounds <b>2</b> , <b>3</b> and <b>4</b> ..... | S5  |
| 4. General Procedure for the selective extraction of thorium vs uranium .....                                            | S9  |
| 5. General Procedure for the liberation of the extracted metal and<br>recuperation of the extraction system .....        | S10 |
| 6. Kinetics of the competitive ternary mixture Th/U/Sc .....                                                             | S10 |
| 7. Computational methods and Cartesian coordinates.....                                                                  | S11 |
| 8. References .....                                                                                                      | S45 |

## 1. General Remarks.

Reagents and solvents were purchased from commercial suppliers and used as received. Low-resolution mass spectra (EI) were obtained with an Agilent GC/MS5973N spectrometer at 70 eV; and fragment ions in  $m/z$  with relative intensities (%) in parentheses. High-resolution mass spectra (HRMS) were also carried out in the electron impact mode (EI) at 70 eV and on a Finnigan MAT95S spectrometer equipped with a time of flight (TOF) analyzer and the samples were ionized by ESI techniques and introduced through an ultra-high pressure liquid chromatography (UPLC) model. NMR spectra were recorded at 300 or 400 MHz for  $^1\text{H}$  NMR, at 75 or 100 MHz for  $^{13}\text{C}$  NMR and at 282 or 376 MHz for  $^{19}\text{F}$  NMR with a Bruker AV300 Oxford or a Bruker AV400 spectrometers, respectively, using  $\text{CDCl}_3$  as solvent, and TMS as internal standard (0.00 ppm). The data are reported as: s = singlet, d = doublet, t = triplet, q = quartet, m = multiplet or unresolved, br s = broad signal, coupling constant(s) in Hz, integration.  $^{13}\text{C}$  NMR spectra were recorded with  $^1\text{H}$ -decoupling at 100 MHz and referenced to  $\text{CDCl}_3$  at 77.16 ppm.  $^{19}\text{F}$  NMR spectra were recorded with  $^1\text{H}$ -decoupling and referenced to  $\text{CF}_3\text{CO}_2\text{H}$  at -76.6 ppm. ICP analyses were recorded in a Perkin Elmer, Model: 7300 DV and the microanalyses obtained using a CHNS Micro TruSpec (LECO) at the General Instrumental Service of the University of Alicante.

## 2. Synthetic procedures and characterization data for compounds 2, 3 and 4

### Synthesis of 1-cyclopropyl-7-(4-ethylpiperazin-1-yl)-6-fluoro-4-oxo-1,4-dihydroquinoline-3-carboxylic acid (2):

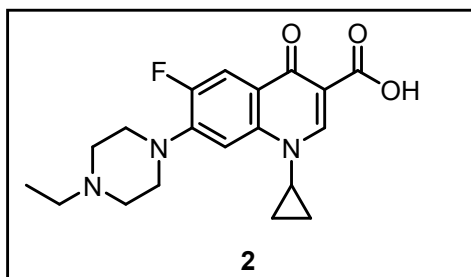

To a solution of ciprofloxacin hydrochloride (3.1 g, 8.0 mmol) and DIPEA (6.7 equiv., 9.3 mL, 6.9 g, 54 mmol) in  $\text{MeCN}:\text{H}_2\text{O}$  (1:1, 30 mL/mmol, 240 mL), bromoethane (5.0 equiv., 3.0 mL, 4.4 g, 40 mmol) was added dropwise at 0 °C. Potassium iodide (10 mol%, 132 mg, 0.8 mmol) was then

added at the same temperature. The mixture was stirred at 0 °C for 1 h and then it was heated to 40 °C and it was stirred at this temperature for 16 h. The solvent was removed under reduced pressure and the residue was dissolved in DCM (40 mL), washed with a

phosphate buffer solution at pH = 6.5 (30 mL) and dried with MgSO<sub>4</sub>. The solvent was removed under reduced pressure and pure compound **2** was obtained without further purification (2.6 g, 7.4 mmol, 92%) as a white solid; <sup>1</sup>H NMR (300 MHz, CDCl<sub>3</sub>) δ 8.75 (s, 1H), 7.99 (d, *J* = 13.1 Hz, 1H), 7.36 (d, *J* = 7.1 Hz, 1H), 3.58–3.52 (m, 1H), 3.39–3.34 (m, 4H), 2.73–2.65 (m, 4H), 2.52 (q, *J* = 7.2 Hz, 2H), 1.42–1.32 (m, 2H), 1.22–1.18 (m, 2H), 1.15 (t, *J* = 7.2 Hz, 3H), \*Proton from the carboxylic acid was not observed; <sup>13</sup>C NMR (101 MHz, CDCl<sub>3</sub>) δ 177.2, 167.8, 153.8 (d, *J* = 252.5 Hz), 147.5, 146.1 (d, *J* = 10.1 Hz), 139.2, 119.8 (d, *J* = 8.1 Hz), 112.4 (d, *J* = 24.2 Hz), 108.2, 104.9, 52.5 (2C), 52.4, 49.9 (2C), 35.4, 12.0, 8.3 (2C); <sup>19</sup>F NMR (282 MHz, CDCl<sub>3</sub>) δ -120.6 (s, 1F); IR (neat) ν<sub>max</sub> 3420–3395, 1707–1675 cm<sup>-1</sup>; LRMS (EI) *m/z* 360 (M<sup>+</sup>+1, 16%), 359 (M<sup>+</sup>, 69%), 344 (24), 316 (21), 315 (100), 287 (13), 257 (13), 230 (12), 150 (10), 84 (24), 70 (12), 57 (32), 56 (11), 44 (27), 42 (19); Elemental analysis calcd for C<sub>19</sub>H<sub>22</sub>FN<sub>3</sub>O<sub>3</sub>: C, 63.50; H, 6.17; F, 5.29; N, 11.69; O, 13.35. Found: C, 63.3; H, 6.5; N, 11.5.

**Synthesis of 1-Cyclopropyl-*N,N*-diethyl-7-(4-ethylpiperazin-1-yl)-6-fluoro-4-oxo-1,4-dihydroquinoline-3-carboxamide (3):** To a solution of **2** (546 mg, 1.50 mmol)

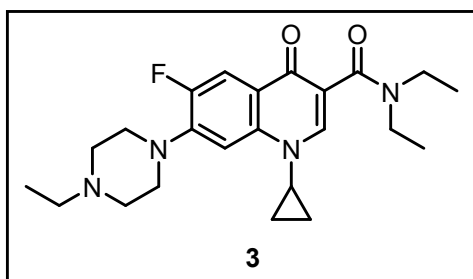

and Et<sub>3</sub>N (3.00 equiv, 0.64 mL, 0.45 g, 4.50 mmol) in DCM (5 mL), diethylamine (3.00 equiv., 0.47 mL, 329 mg, 4.50 mmol) and thionyl chloride (1.10 equiv., 0.12 mL, 196 mg, 1.65 mmol) were added dropwise at 0 °C and the mixture was stirred at this temperature for 30

min. The solvent and the volatile compounds were removed under reduced pressure. The residue was dissolved in CHCl<sub>3</sub> (15 mL), washed with a saturated aqueous solution of sodium bicarbonate (3 x 15 mL), then washed again with a saturated aqueous solution of potassium carbonate (2 x 10 mL) and dried with MgSO<sub>4</sub>. The solvent was removed under reduced pressure and the residue was purified by recrystallization with Et<sub>2</sub>O to yield pure compound **3** (590 mg, 1.42 mmol, 95%) as a yellowish solid; <sup>1</sup>H NMR (400 MHz, CDCl<sub>3</sub>) δ 7.93 (d, *J* = 13.2 Hz, 1H), 7.91 (s, 1H), 7.26 (d, *J* = 7.1 Hz, 1H), 3.55 (q, *J* = 7.1 Hz, 2H), 3.45–3.25 (m, 7H), 2.81 (br s, 4H), 2.64 (d, *J* = 7.4 Hz, 2H), 1.30–1.20 (m, 8H), 1.14–1.09 (m, 5H); <sup>13</sup>C NMR (101 MHz, CDCl<sub>3</sub>) δ 172.6, 166.7, 153.8 (d, *J* = 248.0 Hz), 144.3 (d, *J* = 11.3 Hz), 142.9, 138.6, 121.8 (d, *J* = 7.0 Hz), 119.4, 112.7 (d, *J* = 22.7 Hz), 104.8, 52.4, 49.6 (2C), 43.3 (2C), 39.6 (2C), 34.2, 14.6, 13.1 (2C), 8.3 (2C); <sup>19</sup>F NMR (282 MHz, CDCl<sub>3</sub>) δ -123.7 (s, 1F); LRMS (EI) *m/z* 414 (M<sup>+</sup>, 18%), 342 (12), 316 (21),

315 (100); Elemental analysis calcd for C<sub>23</sub>H<sub>31</sub>FN<sub>4</sub>O<sub>2</sub>: C, 66.64; H, 7.54; F, 4.58; N, 13.52; O, 7.72. Found: C, 68.06; H, 7.84; N, 13.86.

**Synthesis of 7-(4-Butyl-4-ethyl-4-((1,1,1-trifluoro-*N*-((trifluoromethyl)sulfonyl)methyl)sulfonamido)-4λ<sup>5</sup>-piperazin-1-yl)-1-cyclopropyl-*N,N*-diethyl-6-fluoro-4-oxo-1,4-dihydroquinoline-3-carboxamide (4):**

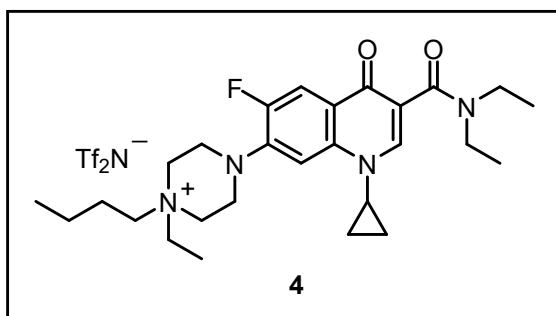

(207 mg, 0.50 mmol) and iodobutane (2.00 equiv., 0.11 mL, 184 mg, 1.00 mmol) in the minimum amount of MeCN was stirred at 80 °C for 48 h. The solvent was removed under reduced pressure. The residue was dissolved in CHCl<sub>3</sub> (10 mL), an aqueous solution of lithium bistriflamide (1.30

equiv, 1M, 1.3 mL) was added and the mixture was stirred at 25 °C for 15 h. Then, the aqueous phase was extracted with CHCl<sub>3</sub> (3 x 10 mL) and the combined organic fractions were washed with H<sub>2</sub>O (2 x 10 mL) and dried with MgSO<sub>4</sub>. The solvent was removed under reduced pressure and the residue was purified by recrystallization with EtOAc to yield pure compound 4 (330 mg, 0.44 mmol, 89%) as a white solid; <sup>1</sup>H NMR (400 MHz, CDCl<sub>3</sub>) δ 8.03 (s, 1H), 7.91 (d, *J* = 14.3 Hz, 1H), 7.59 (d, *J* = 7.2 Hz, 1H), 3.91–3.56 (m, 11H), 3.53–3.33 (m, 5H), 2.89–2.57 (m, 2H), 1.79–1.60 (m, 2H), 1.53–1.45 (m, 4H), 1.41–1.34 (m, 3H), 1.26–1.16 (m, 7H), 1.04 (t, *J* = 7.3 Hz, 3H); <sup>13</sup>C NMR (101 MHz, CDCl<sub>3</sub>) δ 172.6, 167.1, 152.0 (d, *J* = 247.5 Hz), 141.9 (d, *J* = 11.0 Hz), 140.9, 138.8, 121.7 (d, *J* = 6.6 Hz), 120.2 (q, *J* = 259.0 Hz, 2C), 118.3, 111.6 (d, *J* = 21.9 Hz), 106.7, 58.4, 57.8 (2C), 52.4, 43.2 (2C), 34.7 (2C), 29.1, 23.4, 19.7, 14.5, 13.6 (2C), 8.2, 7.2 (2C); <sup>19</sup>F NMR (282 MHz, CDCl<sub>3</sub>) δ -77.8 (s, 6F); -125.2 (s, 1F); LRMS (EI) *m/z*: 471 (M<sup>+</sup>, 12%), 382 (10), 316 (30), 315 (100). Elemental analysis calcd for C<sub>29</sub>H<sub>40</sub>F<sub>7</sub>N<sub>5</sub>O<sub>6</sub>S<sub>2</sub>: C, 46.33; H, 5.36; F, 17.69; N, 9.32; O, 12.77; S, 8.53. Found: C, 46.8; H, 5.5; N, 9.4; S 8.5.

3.  $^1\text{H}$ -,  $^{19}\text{F}$ - and  $^{13}\text{C}$  NMR spectra of compounds 2, 3 and 4.

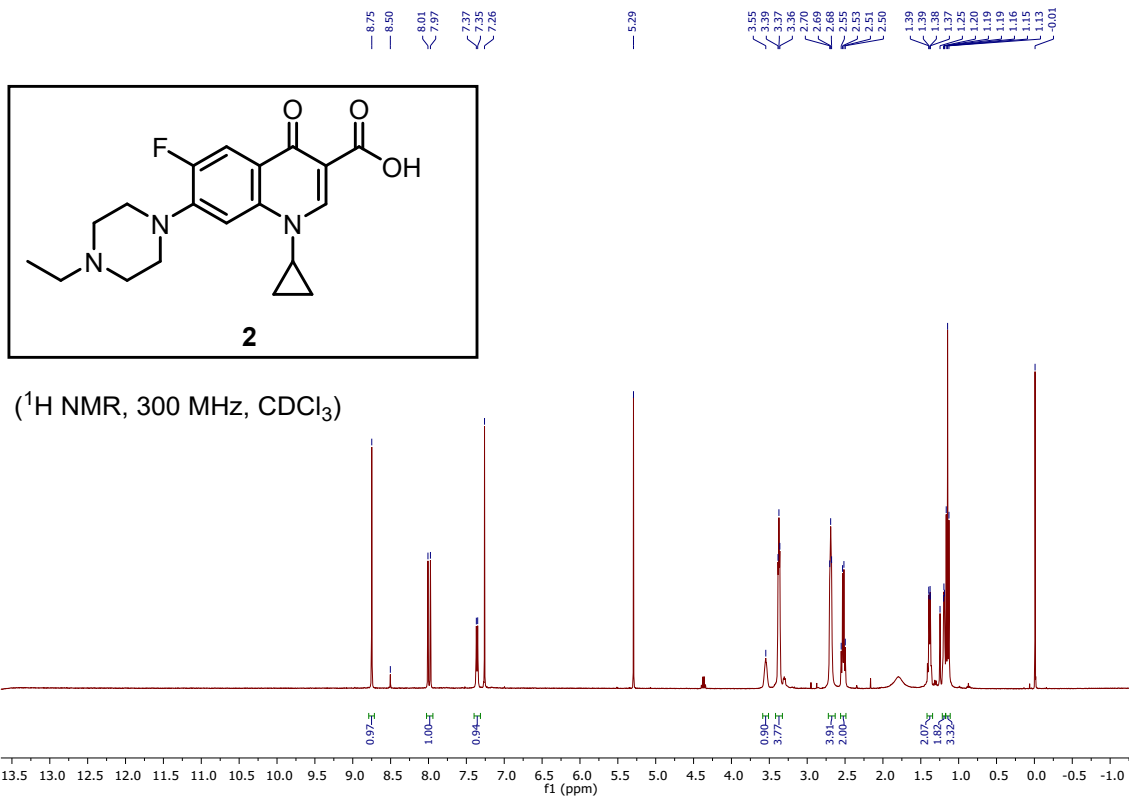

(<sup>19</sup>F NMR, 282 MHz, CDCl<sub>3</sub>)

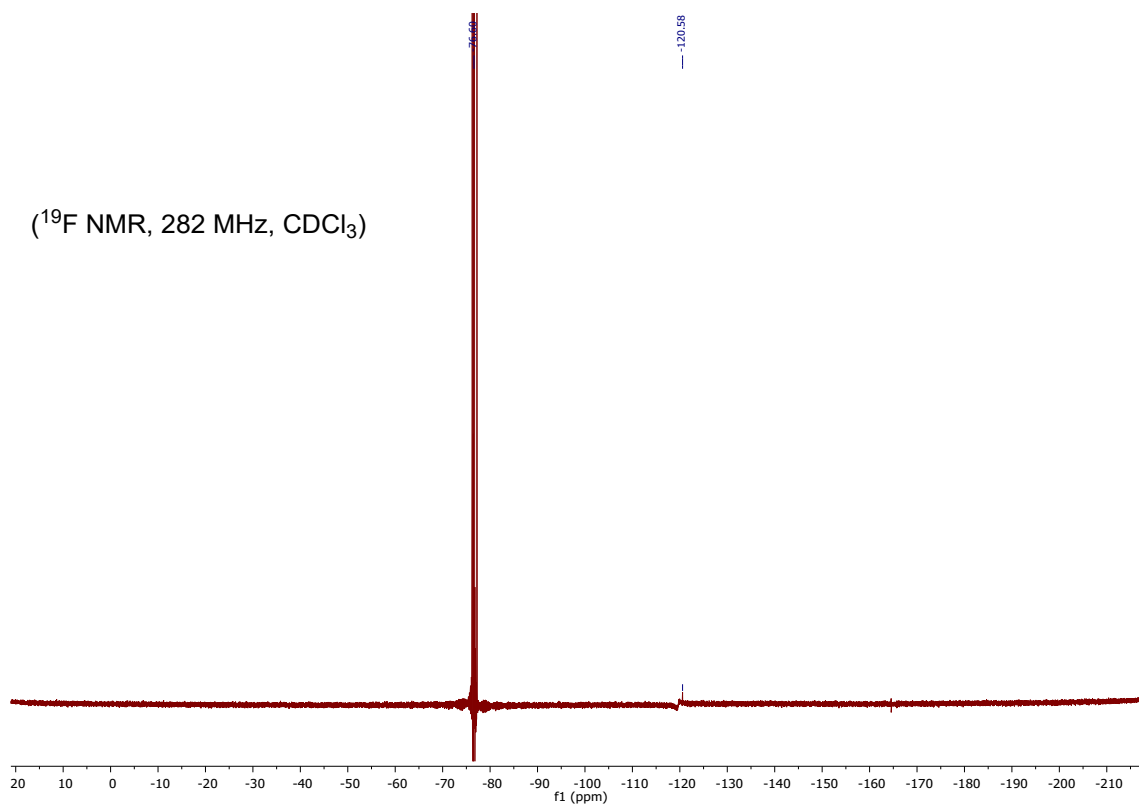

(<sup>13</sup>C NMR, 101 MHz, CDCl<sub>3</sub>)

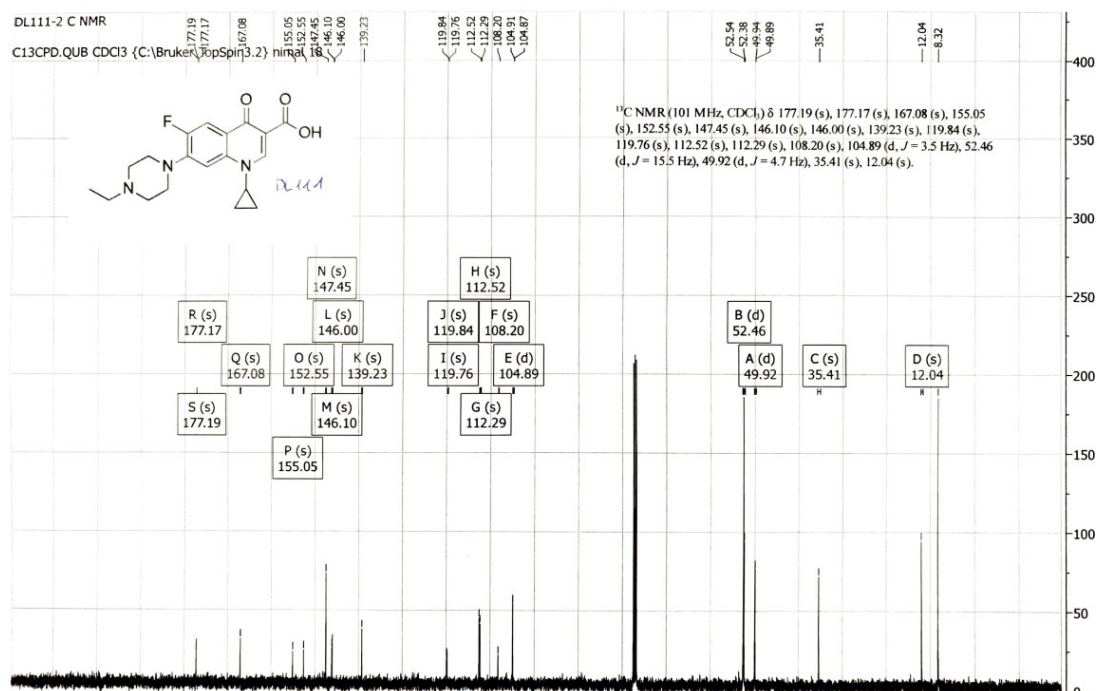

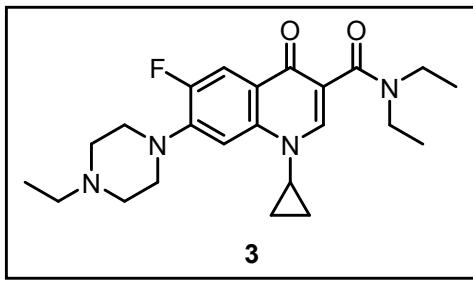

(<sup>1</sup>H NMR, 400 MHz, CDCl<sub>3</sub>)

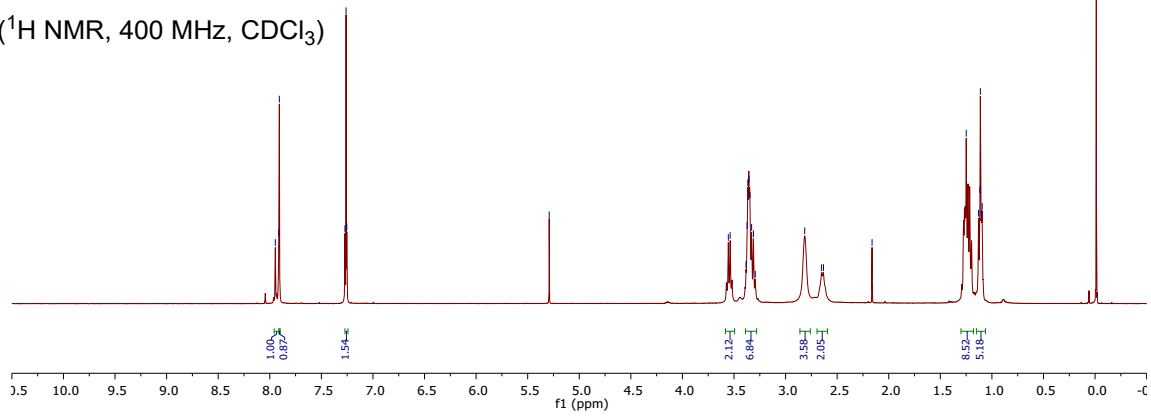

(<sup>19</sup>F NMR, 282 MHz, CDCl<sub>3</sub>)

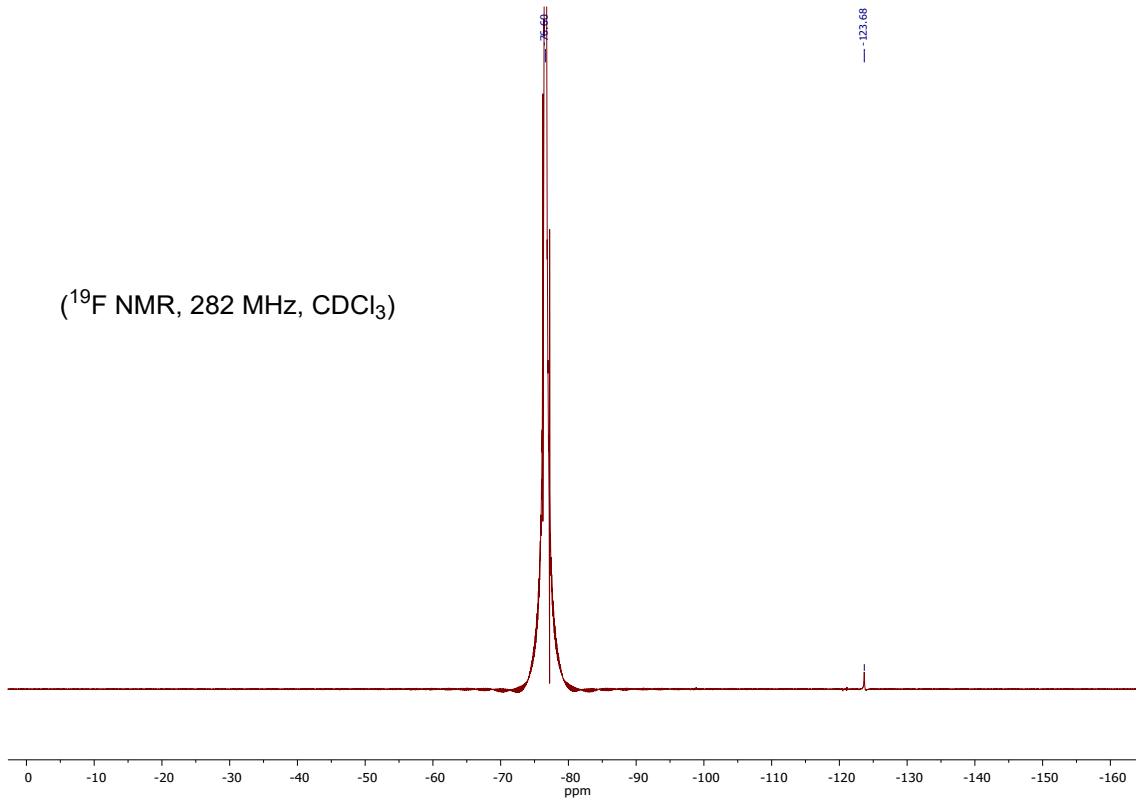

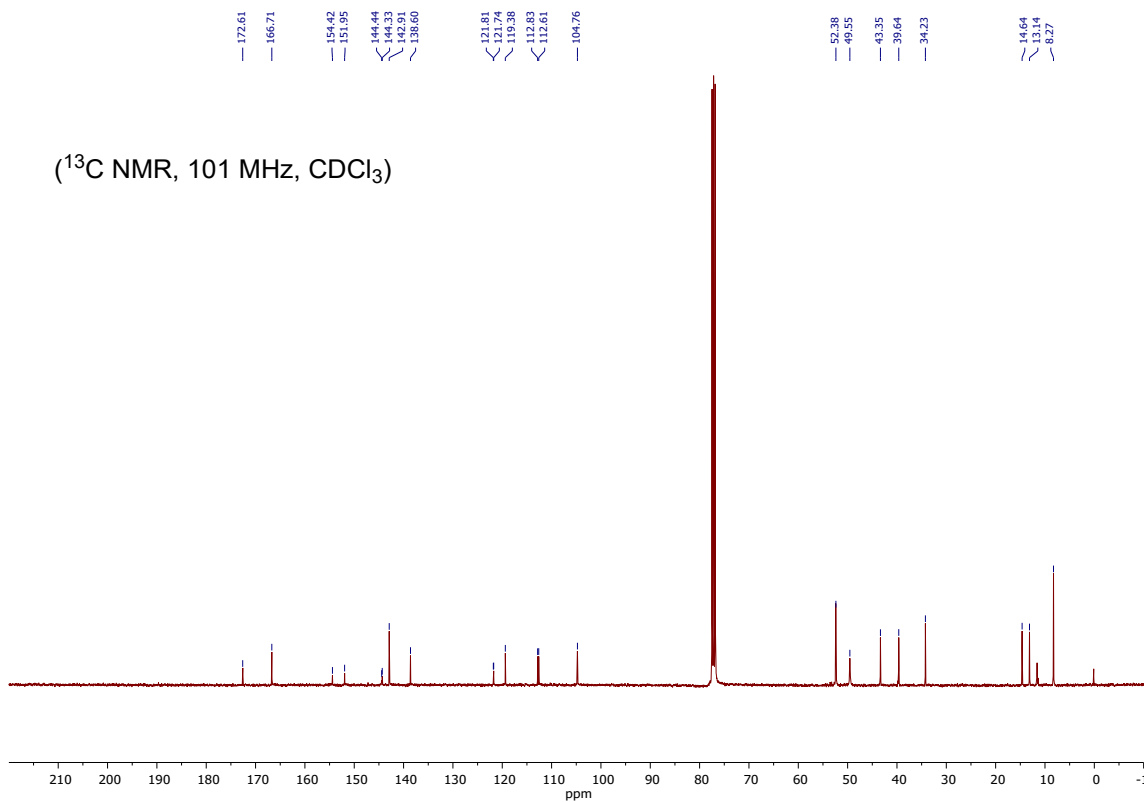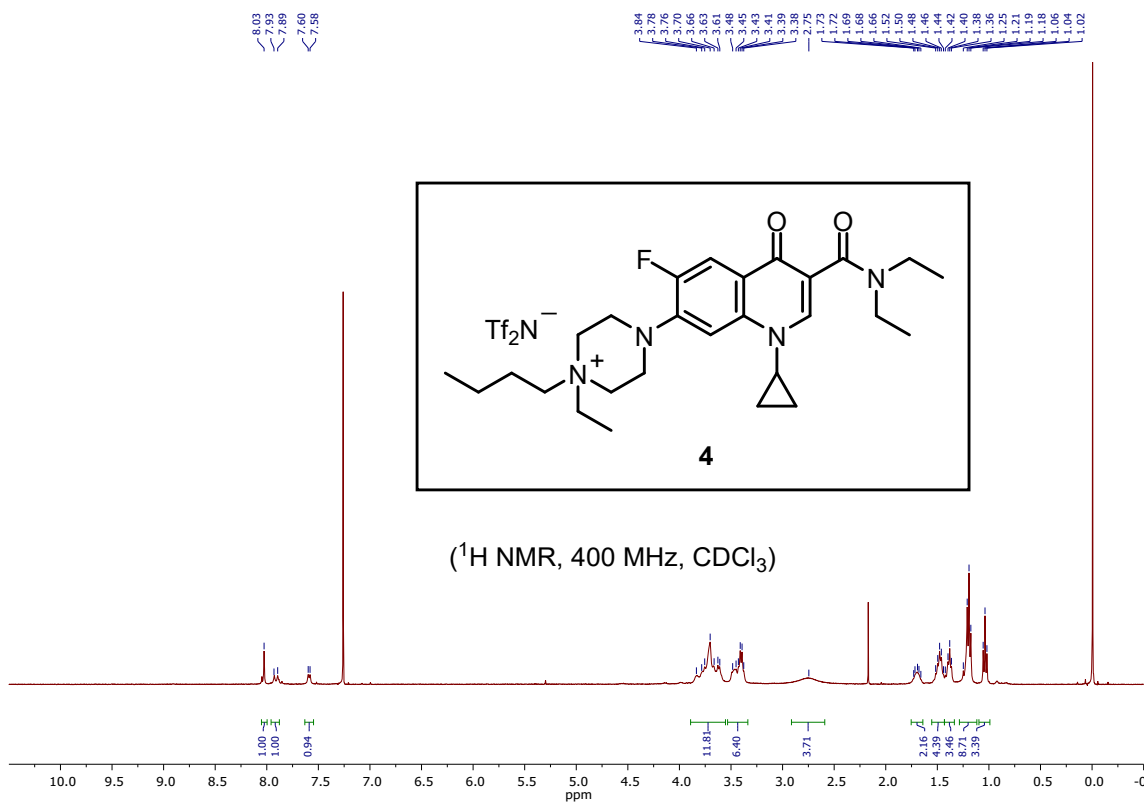



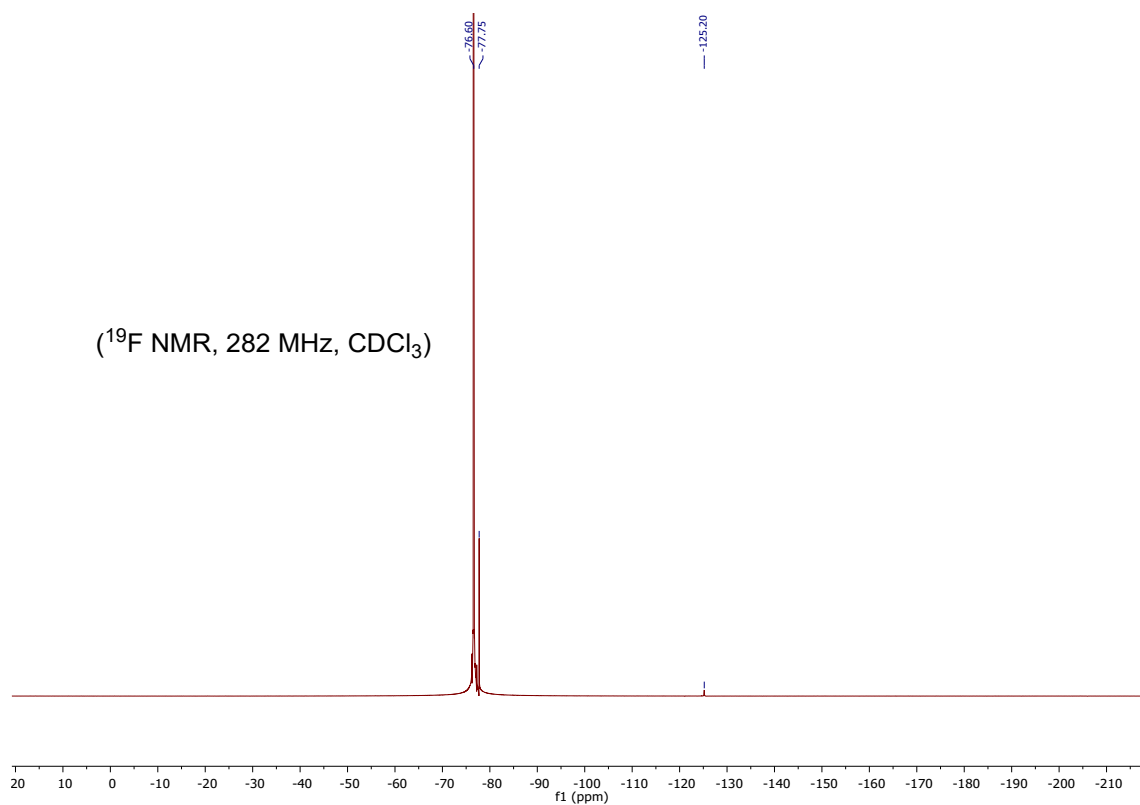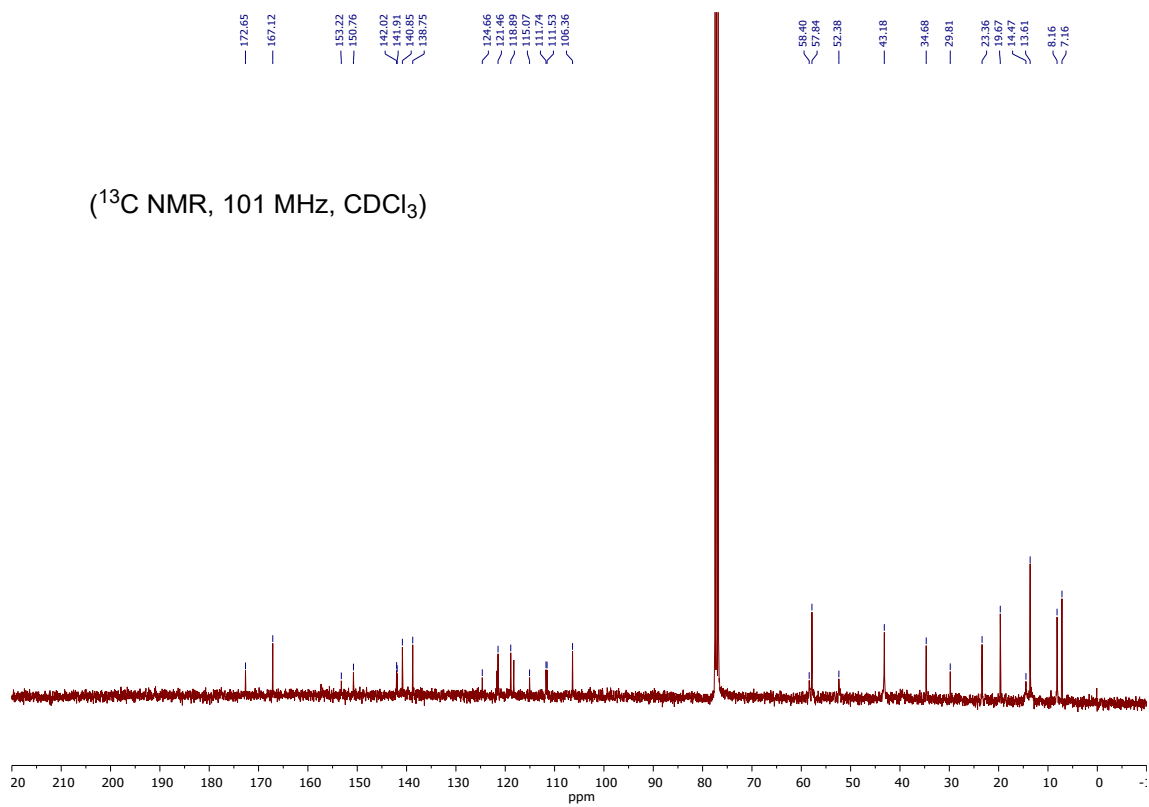

#### 4. General procedure for the selective extraction of thorium versus uranium.

To extract the analytes (thorium and uranium) from an aqueous sample **A** (5 mL), the pH of this sample is adjusted to 1.0 with  $\text{HNO}_3$ . Then, the extractant [0.005M solution of compound **4** in  $[\text{BMIM}][\text{NTf}_2]$  (**5**) was added and the solution was stirred using a vortex mixer. The mixture is then allowed to rest and the two phases are separated. Thorium was extracted in the solution **B**, while uranium remains in the aqueous sample **A**. In Figure S1 it is shown a detailed scheme of the selective extraction process of thorium *versus* uranium.

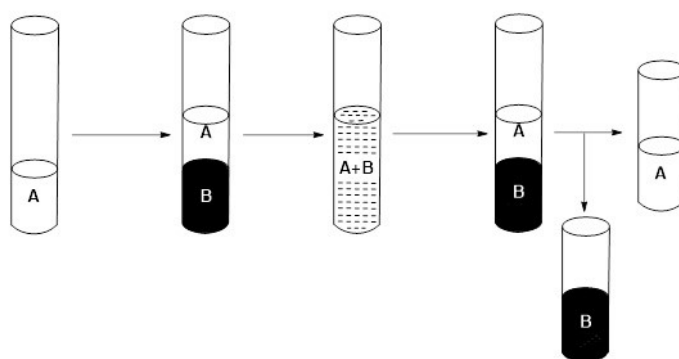

**Figure S1.** Procedure for the selective extraction process of thorium *versus* uranium in an aqueous sample.

#### 5. General Procedure for the liberation of the extracted metal and recuperation of the extraction system (4 in 5).

To remove the thorium from the solution **B** and recover the extraction system (**4** in **5**), a buffer solution at  $\text{pH} = 6.0$  (solution **C**, 5 mL) was added to the solution **B** with the thorium. The mixture was stirred in a vortex mixer for 3 min. The mixture is then allowed to rest and the two phases are separated. Thorium was extracted in aqueous phase, and the extraction system **4+5** was recovered. In Figure S2 it is shown a detailed scheme of the recovery of the extraction system. The thorium recovery was higher than 95% and the recovered extraction system could be used in subsequent extraction cycles.

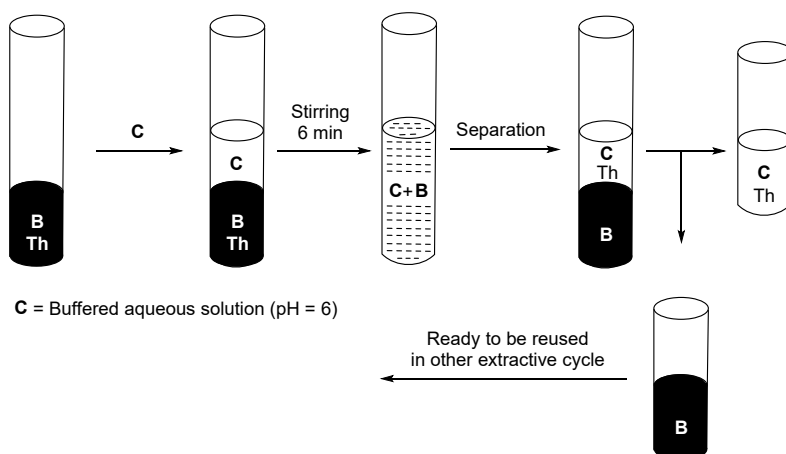

**Figure S2.** Procedure for the recovery of the extraction system by removing the thorium.

## 6. Kinetics of the competitive ternary mixture Th/U/Sc.

Kinetics of the extractive system (0.1M solution of **4** in [BMIM][Tf<sub>2</sub>N], 1 mL) *versus* an original solution (5 mL) containing 0.1M solution of the ternary thorium(IV), scandium(III) and uranyl nitrates was assessed (Figure S3). The extraction profile of the thorium cation was identical to the plot observed in Figure 7A. However, the scandium(III) and the uranyl cations were slightly extracted at earlier stages of the extractive sequence but finally, after 3-5 min, the complexation of ligand **4** with scandium(III) and uranium(VI) was extremely low. The fragment of the plot recorded between 0-5 min in Figure S3 suggested that the ligand bonded initially to the scandium and uranyl cation were kidnaped by the thorium.

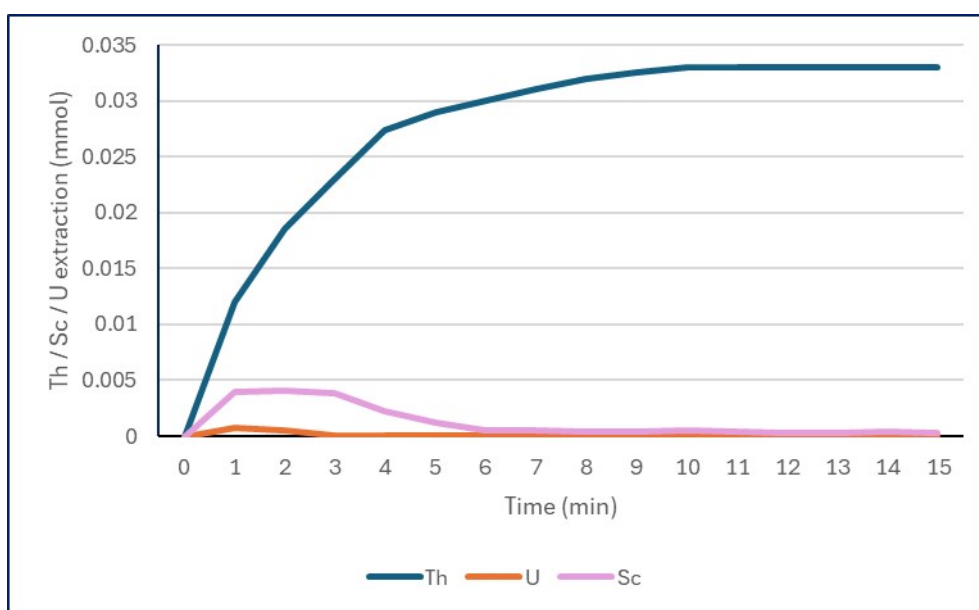

**Figure S3.** Competitive extraction of 0.1M of each thorium(IV), scandium(III) and uranyl nitrate with 0.1M solution of **4** in [BMIM][Tf<sub>2</sub>N].

## 7. Computational methods and Cartesian coordinates.

Theoretical calculations have been carried out by using the GAUSSIAN 16<sup>1</sup> programs. Optimizations were computed within the DFT framework<sup>2</sup> using the hybrid PBE0<sup>3</sup> functional in combination with 6-31g(d) basis set for C, H, N, F and O atoms and Stuttgart/Dresden<sup>4</sup> effective core potential SDD for U and Th atoms as implemented in GAUSSIAN 16. Dispersion corrections are included by means of Grimme's GD3 model.<sup>5</sup> All the stationary points were characterized by harmonic vibrational analysis. Local minima showed positive definite Hessians and thermal corrections were not scaled.

**Table S1.** Total electronic energies<sup>a</sup> (E, in a.u.), zero point correction of the energy<sup>b</sup> (ZPC), thermal corrections to Gibbs free energies<sup>b</sup> (TCGFE, in a.u.), and number of imaginary frequencies (NIMAG) of all stationary points discussed in the main text and in the Supporting Information. Th·2NO<sub>3</sub>·3-**4** Th·2NO<sub>3</sub>·3-**4'** Th·2NO<sub>3</sub>·3-**4''** represent the three most favoured conformations found.

| Structure                                    | E            | ZPC      | TCGFE    | NIMAG |
|----------------------------------------------|--------------|----------|----------|-------|
| <b>4</b> -cation                             | -1520.381750 | 0.656588 | 0.589152 | 0     |
| H <sub>2</sub> O                             | -76.327227   | 0.021518 | 0.003861 | 0     |
| UO <sub>2</sub> ·2NO <sub>3</sub> ·2W-cis    | -1340.223883 | 0.090316 | 0.044582 | 0     |
| UO <sub>2</sub> ·2NO <sub>3</sub> ·2W-       | -1340.226872 | 0.090008 | 0.044641 | 0     |
| UO <sub>2</sub> ·2NO <sub>3</sub> · <b>4</b> | -2707.935652 | 0.698860 | 0.613308 | 0     |
| UO <sub>2</sub> ·NO <sub>3</sub> ·2W         | -1059.966037 | 0.072381 | 0.030499 | 0     |
| UO <sub>2</sub> ·NO <sub>3</sub> · <b>4</b>  | -2427.702762 | 0.682204 | 0.602407 | 0     |
| Th·2NO <sub>3</sub> ·6W-cis                  | -1425.693789 | 0.185208 | 0.132230 | 0     |
| Th·2NO <sub>3</sub> ·6W-trans                | -1425.699156 | 0.183490 | 0.128710 | 0     |
| Th·2NO <sub>3</sub> ·3- <b>4</b>             | -5528.913315 | 2.011762 | 1.845070 | 0     |
| Th·2NO <sub>3</sub> ·3- <b>4'</b>            | -5528.915127 | 2.012383 | 1.847128 | 0     |
| Th·2NO <sub>3</sub> ·3- <b>4''</b>           | -5528.907625 | 2.011764 | 1.845309 | 0     |

<sup>a</sup>Computed at PBE1PBE(PCM)/6-31G(d)&SDD level. <sup>b</sup>Computed at 298.15 K.

Cartesian coordinates (optimized at the PBE1PBE(PCM)/6-31G(d)&SDD level) of all the stationary points collected in the main text

#### 4-cation

| Center<br>Number | Atomic<br>Number | Atomic<br>Type | Coordinates (Angstroms) |           |           |
|------------------|------------------|----------------|-------------------------|-----------|-----------|
|                  |                  |                | X                       | Y         | Z         |
| 1                | 7                | 0              | -5.054507               | -0.594993 | 0.402948  |
| 2                | 6                | 0              | -4.563802               | 0.823263  | 0.327318  |
| 3                | 6                | 0              | -3.038298               | 0.924968  | 0.407906  |
| 4                | 7                | 0              | -2.447517               | -0.234314 | -0.218664 |
| 5                | 6                | 0              | -3.234710               | -0.723053 | -1.332795 |
| 6                | 6                | 0              | -4.497902               | -1.372470 | -0.783136 |
| 7                | 6                | 0              | -1.063625               | -0.405700 | -0.176166 |
| 8                | 6                | 0              | -0.191854               | 0.626031  | 0.150247  |
| 9                | 6                | 0              | 1.190085                | 0.392580  | 0.248557  |
| 10               | 6                | 0              | 1.709459                | -0.891242 | 0.010212  |
| 11               | 6                | 0              | 0.825121                | -1.930801 | -0.308005 |
| 12               | 6                | 0              | -0.518425               | -1.691841 | -0.380454 |
| 13               | 6                | 0              | 3.149800                | -1.199695 | 0.105638  |
| 14               | 6                | 0              | 3.977227                | -0.055995 | 0.447252  |
| 15               | 6                | 0              | 3.388497                | 1.147113  | 0.717094  |
| 16               | 7                | 0              | 2.066900                | 1.417354  | 0.584435  |
| 17               | 9                | 0              | -1.369741               | -2.708485 | -0.628732 |
| 18               | 6                | 0              | 1.569327                | 2.732587  | 0.901908  |
| 19               | 6                | 0              | 1.003300                | 3.588462  | -0.197623 |
| 20               | 6                | 0              | 2.323724                | 3.933600  | 0.419533  |
| 21               | 6                | 0              | 5.448281                | -0.104591 | 0.746575  |
| 22               | 7                | 0              | 6.287469                | -0.717044 | -0.128967 |
| 23               | 6                | 0              | 7.693619                | -0.772274 | 0.251330  |
| 24               | 6                | 0              | 8.483723                | 0.474880  | -0.124920 |
| 25               | 8                | 0              | 3.565663                | -2.346910 | -0.074169 |
| 26               | 6                | 0              | -4.563294               | -1.203164 | 1.712056  |
| 27               | 6                | 0              | -5.166916               | -2.543612 | 2.078599  |
| 28               | 6                | 0              | -6.569059               | -0.635178 | 0.380907  |
| 29               | 6                | 0              | -7.258472               | 0.161550  | -0.727710 |

|    |   |   |           |           |           |
|----|---|---|-----------|-----------|-----------|
| 30 | 6 | 0 | -7.736826 | 1.559800  | -0.332600 |
| 31 | 6 | 0 | -8.497085 | 2.235903  | -1.465925 |
| 32 | 8 | 0 | 5.861317  | 0.445040  | 1.769599  |
| 33 | 6 | 0 | 5.920330  | -1.066321 | -1.498052 |
| 34 | 6 | 0 | 5.710793  | 0.134819  | -2.414789 |
| 35 | 1 | 0 | -0.575768 | 1.623452  | 0.319408  |
| 36 | 1 | 0 | 1.227946  | -2.926771 | -0.459984 |
| 37 | 1 | 0 | 3.996928  | 1.971556  | 1.071637  |
| 38 | 1 | 0 | -2.761429 | 1.874816  | -0.079696 |
| 39 | 1 | 0 | -2.698468 | 0.979531  | 1.447601  |
| 40 | 1 | 0 | -3.473311 | 0.090170  | -2.035387 |
| 41 | 1 | 0 | -2.682901 | -1.474390 | -1.894457 |
| 42 | 1 | 0 | -4.929150 | 1.227737  | -0.616988 |
| 43 | 1 | 0 | -5.034157 | 1.382959  | 1.138540  |
| 44 | 1 | 0 | -4.278347 | -2.378051 | -0.424241 |
| 45 | 1 | 0 | -5.275508 | -1.434742 | -1.545712 |
| 46 | 1 | 0 | -4.784979 | -0.459606 | 2.483464  |
| 47 | 1 | 0 | -3.480896 | -1.284524 | 1.599047  |
| 48 | 1 | 0 | -4.637762 | -2.900250 | 2.967101  |
| 49 | 1 | 0 | -6.226626 | -2.483147 | 2.335264  |
| 50 | 1 | 0 | -5.032528 | -3.303106 | 1.302689  |
| 51 | 1 | 0 | -6.817053 | -1.695375 | 0.305051  |
| 52 | 1 | 0 | -6.895634 | -0.285473 | 1.365845  |
| 53 | 1 | 0 | -8.135192 | -0.423666 | -1.029250 |
| 54 | 1 | 0 | -6.635368 | 0.213885  | -1.630931 |
| 55 | 1 | 0 | -8.385214 | 1.473381  | 0.548943  |
| 56 | 1 | 0 | -6.896338 | 2.195923  | -0.030245 |
| 57 | 1 | 0 | -8.850407 | 3.226047  | -1.163727 |
| 58 | 1 | 0 | -7.862871 | 2.363269  | -2.350713 |
| 59 | 1 | 0 | -9.370427 | 1.644763  | -1.763421 |
| 60 | 1 | 0 | 1.099110  | 2.791798  | 1.881983  |
| 61 | 1 | 0 | 3.210661  | 3.770477  | -0.185513 |
| 62 | 1 | 0 | 2.386534  | 4.782379  | 1.092822  |

|    |   |   |          |           |           |
|----|---|---|----------|-----------|-----------|
| 63 | 1 | 0 | 0.136639 | 4.201605  | 0.031786  |
| 64 | 1 | 0 | 1.018890 | 3.173177  | -1.201164 |
| 65 | 1 | 0 | 6.731421 | -1.690478 | -1.886667 |
| 66 | 1 | 0 | 5.031061 | -1.699588 | -1.472283 |
| 67 | 1 | 0 | 5.444791 | -0.204753 | -3.422011 |
| 68 | 1 | 0 | 4.895624 | 0.767079  | -2.048504 |
| 69 | 1 | 0 | 6.611860 | 0.751247  | -2.489521 |
| 70 | 1 | 0 | 8.126889 | -1.662487 | -0.218474 |
| 71 | 1 | 0 | 7.729918 | -0.912040 | 1.334358  |
| 72 | 1 | 0 | 9.516679 | 0.391624  | 0.230971  |
| 73 | 1 | 0 | 8.514064 | 0.624395  | -1.209065 |
| 74 | 1 | 0 | 8.028607 | 1.353753  | 0.340592  |

## H<sub>2</sub>O

| Center Number | Atomic Number | Atomic Type | Coordinates (Angstroms) |           |           |
|---------------|---------------|-------------|-------------------------|-----------|-----------|
|               |               |             | X                       | Y         | Z         |
| 1             | 8             | 0           | 0.000000                | 0.000000  | 0.119418  |
| 2             | 1             | 0           | 0.000000                | -0.758011 | -0.477671 |
| 3             | 1             | 0           | 0.000000                | 0.758011  | -0.477671 |

## UO<sub>2</sub>·2NO<sub>3</sub>·2W-cis

| Center Number | Atomic Number | Atomic Type | Coordinates (Angstroms) |           |           |
|---------------|---------------|-------------|-------------------------|-----------|-----------|
|               |               |             | X                       | Y         | Z         |
| 1             | 92            | 0           | -0.000031               | 0.230324  | -0.000188 |
| 2             | 8             | 0           | 1.313766                | 2.410186  | -0.030727 |
| 3             | 8             | 0           | 1.362098                | -1.796955 | 0.005951  |
| 4             | 7             | 0           | 2.499456                | -1.228560 | 0.014799  |
| 5             | 8             | 0           | 3.536760                | -1.827361 | 0.027590  |
| 6             | 8             | 0           | 2.440406                | 0.050848  | 0.007457  |

|    |   |   |           |           |           |
|----|---|---|-----------|-----------|-----------|
| 7  | 8 | 0 | -2.440281 | 0.050819  | -0.007303 |
| 8  | 8 | 0 | -1.362004 | -1.796984 | -0.005811 |
| 9  | 8 | 0 | 0.005185  | 0.270899  | 1.746483  |
| 10 | 8 | 0 | -1.313636 | 2.410446  | 0.031426  |
| 11 | 8 | 0 | -0.005297 | 0.270503  | -1.746868 |
| 12 | 1 | 0 | -1.167265 | 2.931440  | 0.835805  |
| 13 | 1 | 0 | 2.264838  | 2.212798  | -0.001754 |
| 14 | 1 | 0 | -2.264594 | 2.212581  | 0.001512  |
| 15 | 1 | 0 | 1.166665  | 2.933567  | -0.833406 |
| 16 | 7 | 0 | -2.499374 | -1.228629 | -0.014371 |
| 17 | 8 | 0 | -3.536669 | -1.827383 | -0.026676 |

UO<sub>2</sub>·2NO<sub>3</sub>·2W-trans

| Center Number | Atomic Number | Atomic Type | Coordinates (Angstroms) |           |           |
|---------------|---------------|-------------|-------------------------|-----------|-----------|
|               |               |             | X                       | Y         | Z         |
| 1             | 92            | 0           | -0.000060               | -0.000063 | -0.043892 |
| 2             | 8             | 0           | 0.000089                | -2.509952 | -0.012771 |
| 3             | 8             | 0           | 2.206918                | 1.070330  | 0.014146  |
| 4             | 7             | 0           | 2.899901                | 0.000034  | 0.057819  |
| 5             | 8             | 0           | 4.095462                | 0.000178  | 0.130398  |
| 6             | 8             | 0           | 2.207138                | -1.070336 | 0.014301  |
| 7             | 8             | 0           | -2.206875               | 1.070407  | 0.013814  |
| 8             | 8             | 0           | -2.207071               | -1.070285 | 0.014006  |
| 9             | 8             | 0           | -0.000425               | 0.000410  | 1.704402  |
| 10            | 8             | 0           | 0.000276                | 2.510025  | -0.013227 |
| 11            | 8             | 0           | 0.000288                | -0.000296 | -1.788359 |
| 12            | 1             | 0           | 0.783817                | 2.911634  | 0.392521  |
| 13            | 1             | 0           | 0.783218                | -2.912399 | 0.392889  |
| 14            | 1             | 0           | -0.782212               | 2.912522  | 0.393658  |



|    |   |   |           |           |          |
|----|---|---|-----------|-----------|----------|
| 15 | 1 | 0 | -0.782868 | -2.913027 | 0.392603 |
| 16 | 7 | 0 | -2.899870 | 0.000141  | 0.057656 |
| 17 | 8 | 0 | -4.095385 | 0.000256  | 0.130547 |

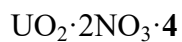

| Center Number | Atomic Number | Atomic Type | Coordinates (Angstroms) |           |           |
|---------------|---------------|-------------|-------------------------|-----------|-----------|
|               |               |             | X                       | Y         | Z         |
| 1             | 6             | 0           | 5.756245                | 0.999192  | 0.809105  |
| 2             | 7             | 0           | 4.933743                | 0.079164  | 0.059043  |
| 3             | 6             | 0           | 5.607222                | -0.447852 | -1.125815 |
| 4             | 6             | 0           | 7.111753                | -0.515572 | -0.879179 |
| 5             | 7             | 0           | 7.433722                | -0.880279 | 0.539675  |
| 6             | 6             | 0           | 6.899480                | 0.212354  | 1.450475  |
| 7             | 6             | 0           | 3.555974                | 0.286168  | -0.033914 |
| 8             | 6             | 0           | 2.722181                | -0.828352 | -0.284790 |
| 9             | 6             | 0           | 1.362781                | -0.718453 | -0.366029 |
| 10            | 6             | 0           | 0.759622                | 0.535458  | -0.175158 |
| 11            | 6             | 0           | 1.562869                | 1.660879  | 0.091606  |
| 12            | 6             | 0           | 2.958697                | 1.526780  | 0.151692  |
| 13            | 7             | 0           | 0.949718                | 2.894312  | 0.291653  |
| 14            | 6             | 0           | -0.392754               | 2.995072  | 0.251586  |
| 15            | 6             | 0           | -1.236238               | 1.948634  | -0.024595 |
| 16            | 6             | 0           | -0.688851               | 0.633174  | -0.217639 |
| 17            | 8             | 0           | -1.378378               | -0.387750 | -0.426157 |
| 18            | 92            | 0           | -3.644784               | -1.196739 | 0.016807  |
| 19            | 8             | 0           | -3.226380               | -1.661313 | 1.651837  |
| 20            | 6             | 0           | 1.739202                | 4.055789  | 0.642867  |
| 21            | 6             | 0           | 2.627267                | 4.681804  | -0.395072 |
| 22            | 6             | 0           | 1.385373                | 5.387938  | 0.054300  |
| 23            | 6             | 0           | -2.712341               | 2.055197  | 0.034887  |
| 24            | 8             | 0           | -3.328369               | 1.131337  | 0.616417  |
| 25            | 9             | 0           | 3.303394                | -2.030885 | -0.407654 |

|    |   |   |           |           |           |
|----|---|---|-----------|-----------|-----------|
| 26 | 6 | 0 | 6.766587  | -2.217248 | 0.851673  |
| 27 | 6 | 0 | 7.161548  | -2.854091 | 2.168330  |
| 28 | 6 | 0 | 8.931085  | -1.024532 | 0.731613  |
| 29 | 6 | 0 | 9.797252  | 0.124123  | 0.210430  |
| 30 | 6 | 0 | 10.397867 | -0.065230 | -1.187501 |
| 31 | 6 | 0 | 11.405168 | -1.207127 | -1.266167 |
| 32 | 8 | 0 | -4.013300 | -3.567080 | -0.568242 |
| 33 | 7 | 0 | -2.819578 | -3.841782 | -0.908062 |
| 34 | 8 | 0 | -2.011122 | -2.862717 | -0.830777 |
| 35 | 8 | 0 | -5.677465 | -0.019145 | 0.822195  |
| 36 | 7 | 0 | -3.387394 | 3.080996  | -0.492154 |
| 37 | 6 | 0 | -4.848648 | 3.085304  | -0.307123 |
| 38 | 6 | 0 | -5.264133 | 3.476045  | 1.101993  |
| 39 | 6 | 0 | -2.825484 | 4.106992  | -1.365699 |
| 40 | 6 | 0 | -2.849253 | 5.498558  | -0.750416 |
| 41 | 8 | 0 | -2.481783 | -4.939156 | -1.273950 |
| 42 | 8 | 0 | -4.058533 | -0.707919 | -1.615067 |
| 43 | 1 | 0 | 3.575375  | 2.399537  | 0.324579  |
| 44 | 1 | 0 | 0.735832  | -1.587357 | -0.542153 |
| 45 | 1 | 0 | -0.776245 | 3.981608  | 0.481676  |
| 46 | 1 | 0 | 5.449524  | 0.196484  | -2.003657 |
| 47 | 1 | 0 | 5.204129  | -1.433474 | -1.364108 |
| 48 | 1 | 0 | 6.138465  | 1.831030  | 0.196055  |
| 49 | 1 | 0 | 5.171706  | 1.437392  | 1.621361  |
| 50 | 1 | 0 | 7.586045  | 0.447555  | -1.071190 |
| 51 | 1 | 0 | 7.576582  | -1.257862 | -1.531861 |
| 52 | 1 | 0 | 6.562256  | -0.279127 | 2.362694  |
| 53 | 1 | 0 | 7.725817  | 0.877560  | 1.704830  |
| 54 | 1 | 0 | 7.029754  | -2.873759 | 0.016725  |
| 55 | 1 | 0 | 5.692537  | -2.024864 | 0.818598  |
| 56 | 1 | 0 | 6.528699  | -3.737085 | 2.297639  |
| 57 | 1 | 0 | 8.199209  | -3.193995 | 2.188504  |
| 58 | 1 | 0 | 6.983151  | -2.207906 | 3.033048  |

|    |   |   |           |           |           |
|----|---|---|-----------|-----------|-----------|
| 59 | 1 | 0 | 9.062500  | -1.149446 | 1.807965  |
| 60 | 1 | 0 | 9.203727  | -1.969872 | 0.252923  |
| 61 | 1 | 0 | 10.625181 | 0.231310  | 0.921234  |
| 62 | 1 | 0 | 9.256891  | 1.077907  | 0.265568  |
| 63 | 1 | 0 | 9.614183  | -0.210833 | -1.940732 |
| 64 | 1 | 0 | 10.897542 | 0.871903  | -1.458424 |
| 65 | 1 | 0 | 11.837527 | -1.270435 | -2.269146 |
| 66 | 1 | 0 | 12.226321 | -1.056506 | -0.556370 |
| 67 | 1 | 0 | 10.954949 | -2.183471 | -1.050454 |
| 68 | 1 | 0 | 2.089992  | 4.030403  | 1.672107  |
| 69 | 1 | 0 | 2.612480  | 4.243886  | -1.389037 |
| 70 | 1 | 0 | 3.594289  | 5.055798  | -0.072422 |
| 71 | 1 | 0 | 1.472337  | 6.252556  | 0.704175  |
| 72 | 1 | 0 | 0.566315  | 5.440132  | -0.657793 |
| 73 | 1 | 0 | -5.252394 | 3.786497  | -1.042776 |
| 74 | 1 | 0 | -5.225301 | 2.086070  | -0.542981 |
| 75 | 1 | 0 | -6.356331 | 3.485330  | 1.168424  |
| 76 | 1 | 0 | -4.891002 | 2.745728  | 1.823627  |
| 77 | 1 | 0 | -4.892795 | 4.470785  | 1.369296  |
| 78 | 1 | 0 | -3.414944 | 4.099124  | -2.290185 |
| 79 | 1 | 0 | -1.813004 | 3.811747  | -1.647974 |
| 80 | 1 | 0 | -2.428161 | 6.224623  | -1.452988 |
| 81 | 1 | 0 | -3.871724 | 5.813444  | -0.519940 |
| 82 | 1 | 0 | -2.274515 | 5.544862  | 0.181431  |
| 83 | 7 | 0 | -6.472670 | -1.009345 | 0.733327  |
| 84 | 8 | 0 | -5.931319 | -2.084566 | 0.327523  |
| 85 | 8 | 0 | -7.642472 | -0.931298 | 1.011374  |

UO<sub>2</sub>·NO<sub>3</sub>·2W

| Center Number | Atomic Number | Atomic Type | Coordinates (Angstroms) |           |           |
|---------------|---------------|-------------|-------------------------|-----------|-----------|
|               |               |             | X                       | Y         | Z         |
| 1             | 8             | 0           | 1.582316                | -2.103923 | -0.000805 |
| 2             | 92            | 0           | 0.408170                | 0.012338  | -0.000040 |

|    |   |   |           |           |           |
|----|---|---|-----------|-----------|-----------|
| 3  | 8 | 0 | 1.062847  | 2.335534  | 0.001336  |
| 4  | 8 | 0 | 0.481243  | 0.021257  | -1.731575 |
| 5  | 8 | 0 | 0.480939  | 0.016103  | 1.731499  |
| 6  | 8 | 0 | -1.626671 | -1.157578 | -0.000864 |
| 7  | 8 | 0 | -1.745537 | 0.980400  | 0.000896  |
| 8  | 7 | 0 | -2.398442 | -0.126463 | 0.000036  |
| 9  | 8 | 0 | -3.582196 | -0.194437 | -0.000156 |
| 10 | 1 | 0 | 1.162065  | 2.902483  | -0.781473 |
| 11 | 1 | 0 | 1.163264  | 2.900460  | 0.785464  |
| 12 | 1 | 0 | 1.842706  | -2.615440 | -0.785037 |
| 13 | 1 | 0 | 1.845873  | -2.616178 | 0.781873  |

UO<sub>2</sub>·NO<sub>3</sub>·4

| Center Number | Atomic Number | Atomic Type | Coordinates (Angstroms) |           |           |
|---------------|---------------|-------------|-------------------------|-----------|-----------|
|               |               |             | X                       | Y         | Z         |
| 1             | 6             | 0           | -5.103872               | 0.201598  | -0.968840 |
| 2             | 7             | 0           | -4.253792               | -0.665231 | -0.180947 |
| 3             | 6             | 0           | -4.941807               | -1.595319 | 0.714907  |
| 4             | 6             | 0           | -6.386293               | -1.172131 | 0.894836  |
| 5             | 7             | 0           | -7.164655               | -1.186608 | -0.394277 |
| 6             | 6             | 0           | -6.307774               | -0.566283 | -1.487205 |
| 7             | 6             | 0           | -2.927249               | -0.351364 | -0.015310 |
| 8             | 6             | 0           | -2.009069               | -1.316607 | 0.489964  |
| 9             | 6             | 0           | -0.681853               | -1.052875 | 0.647031  |
| 10            | 6             | 0           | -0.165016               | 0.206204  | 0.286893  |
| 11            | 6             | 0           | -1.047762               | 1.178960  | -0.232679 |
| 12            | 6             | 0           | -2.409960               | 0.895861  | -0.375037 |
| 13            | 7             | 0           | -0.531081               | 2.416203  | -0.602822 |
| 14            | 6             | 0           | 0.778493                | 2.670201  | -0.476564 |
| 15            | 6             | 0           | 1.688989                | 1.774157  | 0.043698  |
| 16            | 6             | 0           | 1.236306                | 0.470578  | 0.406790  |
| 17            | 8             | 0           | 2.031184                | -0.433053 | 0.837465  |
| 18            | 92            | 0           | 4.003632                | -1.163147 | -0.023831 |

|    |   |   |            |           |           |
|----|---|---|------------|-----------|-----------|
| 19 | 6 | 0 | -1.387951  | 3.409881  | -1.223836 |
| 20 | 6 | 0 | -2.416650  | 4.119301  | -0.390130 |
| 21 | 6 | 0 | -1.208454  | 4.856769  | -0.879152 |
| 22 | 6 | 0 | 3.139579   | 2.076261  | 0.094989  |
| 23 | 8 | 0 | 3.950334   | 1.168036  | -0.255968 |
| 24 | 9 | 0 | -2.468262  | -2.536767 | 0.785186  |
| 25 | 6 | 0 | -7.476719  | -2.632823 | -0.754070 |
| 26 | 6 | 0 | -8.272910  | -2.826454 | -2.029023 |
| 27 | 6 | 0 | -8.480070  | -0.448074 | -0.226010 |
| 28 | 6 | 0 | -8.389580  | 1.009194  | 0.234851  |
| 29 | 6 | 0 | -8.711753  | 1.246921  | 1.715004  |
| 30 | 6 | 0 | -10.173503 | 0.985251  | 2.060131  |
| 31 | 7 | 0 | 3.610059   | 3.258400  | 0.478571  |
| 32 | 6 | 0 | 5.062972   | 3.485132  | 0.370222  |
| 33 | 6 | 0 | 5.506844   | 3.745417  | -1.060595 |
| 34 | 6 | 0 | 2.834342   | 4.307963  | 1.145900  |
| 35 | 6 | 0 | 2.736760   | 5.591078  | 0.335480  |
| 36 | 1 | 0 | -3.070001  | 1.669942  | -0.739949 |
| 37 | 1 | 0 | -0.017545  | -1.824342 | 1.020204  |
| 38 | 1 | 0 | 1.090781   | 3.638137  | -0.847353 |
| 39 | 1 | 0 | -4.488215  | -1.571476 | 1.709377  |
| 40 | 1 | 0 | -4.859755  | -2.626509 | 0.357599  |
| 41 | 1 | 0 | -5.400269  | 1.111171  | -0.425714 |
| 42 | 1 | 0 | -4.556364  | 0.525370  | -1.860052 |
| 43 | 1 | 0 | -6.430188  | -0.157497 | 1.290134  |
| 44 | 1 | 0 | -6.897824  | -1.834062 | 1.597225  |
| 45 | 1 | 0 | -5.948701  | -1.383492 | -2.115126 |
| 46 | 1 | 0 | -6.942125  | 0.081920  | -2.093393 |
| 47 | 1 | 0 | -8.013123  | -3.046294 | 0.104383  |
| 48 | 1 | 0 | -6.512166  | -3.140206 | -0.824542 |
| 49 | 1 | 0 | -8.296454  | -3.900248 | -2.236263 |
| 50 | 1 | 0 | -9.309283  | -2.494395 | -1.939468 |
| 51 | 1 | 0 | -7.816917  | -2.343220 | -2.897935 |

|    |   |   |            |           |           |
|----|---|---|------------|-----------|-----------|
| 52 | 1 | 0 | -8.966486  | -0.517146 | -1.199347 |
| 53 | 1 | 0 | -9.064617  | -1.048064 | 0.478391  |
| 54 | 1 | 0 | -9.108148  | 1.578920  | -0.365393 |
| 55 | 1 | 0 | -7.413918  | 1.438083  | -0.019640 |
| 56 | 1 | 0 | -8.067804  | 0.635952  | 2.361203  |
| 57 | 1 | 0 | -8.467751  | 2.289558  | 1.947522  |
| 58 | 1 | 0 | -10.363061 | 1.193123  | 3.117257  |
| 59 | 1 | 0 | -10.836573 | 1.625649  | 1.467859  |
| 60 | 1 | 0 | -10.468895 | -0.055451 | 1.880275  |
| 61 | 1 | 0 | -1.638048  | 3.152655  | -2.250109 |
| 62 | 1 | 0 | -2.451610  | 3.879799  | 0.668849  |
| 63 | 1 | 0 | -3.380003  | 4.323290  | -0.847446 |
| 64 | 1 | 0 | -1.313423  | 5.570896  | -1.689268 |
| 65 | 1 | 0 | -0.467648  | 5.129077  | -0.132317 |
| 66 | 1 | 0 | 5.292900   | 4.339469  | 1.011266  |
| 67 | 1 | 0 | 5.573130   | 2.611787  | 0.785245  |
| 68 | 1 | 0 | 6.587252   | 3.916559  | -1.080988 |
| 69 | 1 | 0 | 5.287206   | 2.887359  | -1.701323 |
| 70 | 1 | 0 | 5.013757   | 4.628999  | -1.476758 |
| 71 | 1 | 0 | 3.335164   | 4.506173  | 2.100302  |
| 72 | 1 | 0 | 1.848847   | 3.911825  | 1.395708  |
| 73 | 1 | 0 | 2.152987   | 6.331173  | 0.891061  |
| 74 | 1 | 0 | 3.724031   | 6.023932  | 0.148823  |
| 75 | 1 | 0 | 2.258305   | 5.432952  | -0.637316 |
| 76 | 8 | 0 | 4.790223   | -1.012317 | 1.522483  |
| 77 | 8 | 0 | 3.279089   | -1.292746 | -1.602897 |
| 78 | 8 | 0 | 3.223803   | -3.356089 | 0.538824  |
| 79 | 8 | 0 | 5.154631   | -3.258255 | -0.396462 |
| 80 | 7 | 0 | 4.241554   | -4.002144 | 0.102657  |
| 81 | 8 | 0 | 4.327230   | -5.191580 | 0.158682  |

Th·2NO<sub>3</sub>·6W-cis

| Center | Atomic | Atomic | Coordinates (Angstroms) |  |  |
|--------|--------|--------|-------------------------|--|--|
|--------|--------|--------|-------------------------|--|--|

| Number | Number | Type | X         | Y         | Z         |
|--------|--------|------|-----------|-----------|-----------|
| 1      | 8      | 0    | 0.528208  | -2.626440 | 0.522391  |
| 2      | 90     | 0    | 0.318155  | -0.128399 | -0.000256 |
| 3      | 8      | 0    | 0.225939  | -0.647387 | 2.478035  |
| 4      | 8      | 0    | -1.557526 | -1.329785 | -0.987481 |
| 5      | 7      | 0    | -2.411813 | -1.118862 | -0.045454 |
| 6      | 8      | 0    | -3.547439 | -1.444123 | -0.103720 |
| 7      | 8      | 0    | -1.888193 | -0.516661 | 0.964504  |
| 8      | 8      | 0    | 0.428987  | -0.741817 | -2.441374 |
| 9      | 8      | 0    | 1.715885  | 1.453348  | -1.415067 |
| 10     | 8      | 0    | 2.145474  | 1.093905  | 1.342090  |
| 11     | 8      | 0    | -1.179963 | 1.511601  | -0.964427 |
| 12     | 7      | 0    | -1.117486 | 2.361361  | -0.001351 |
| 13     | 8      | 0    | -1.748263 | 3.360851  | 0.040586  |
| 14     | 8      | 0    | 2.632132  | -1.106273 | -0.380347 |
| 15     | 8      | 0    | -0.285491 | 2.006408  | 0.924516  |
| 16     | 1      | 0    | 0.542956  | -2.928821 | 1.446515  |
| 17     | 1      | 0    | 1.167664  | -0.922627 | -3.043961 |
| 18     | 1      | 0    | 2.242242  | 2.174764  | -1.033851 |
| 19     | 1      | 0    | 3.046957  | 0.835209  | 1.591069  |
| 20     | 1      | 0    | 2.813023  | -2.052319 | -0.248602 |
| 21     | 1      | 0    | -0.671521 | -0.724657 | 2.849778  |
| 22     | 1      | 0    | 1.943925  | 1.939143  | 1.779404  |
| 23     | 1      | 0    | 1.362868  | 1.777725  | -2.261184 |
| 24     | 1      | 0    | -0.387893 | -1.049217 | -2.873645 |
| 25     | 1      | 0    | 3.384325  | -0.726275 | -0.862907 |
| 26     | 1      | 0    | 0.079799  | -3.317361 | 0.005234  |
| 27     | 1      | 0    | 0.788814  | -0.256202 | 3.165201  |

Th·2NO<sub>3</sub>·6W-trans

| Center<br>Number | Atomic<br>Number | Atomic<br>Type | Coordinates (Angstroms) |   |   |
|------------------|------------------|----------------|-------------------------|---|---|
|                  |                  |                | X                       | Y | Z |

|    |    |   |           |           |           |
|----|----|---|-----------|-----------|-----------|
| 1  | 8  | 0 | 1.405995  | -2.205141 | -0.079742 |
| 2  | 90 | 0 | -0.007154 | -0.081974 | 0.013317  |
| 3  | 8  | 0 | 0.077847  | -1.076072 | -2.304373 |
| 4  | 8  | 0 | 2.239801  | 0.182610  | 1.002288  |
| 5  | 7  | 0 | 2.830231  | 0.556587  | -0.080928 |
| 6  | 8  | 0 | 3.992311  | 0.767489  | -0.154437 |
| 7  | 8  | 0 | 2.020684  | 0.676515  | -1.079654 |
| 8  | 8  | 0 | 0.109627  | -0.835778 | 2.394369  |
| 9  | 8  | 0 | 0.298046  | 2.056939  | 1.276777  |
| 10 | 8  | 0 | -0.412513 | 1.845100  | -1.530385 |
| 11 | 8  | 0 | -2.059887 | 0.752993  | 1.010582  |
| 12 | 7  | 0 | -2.863894 | 0.492397  | 0.035493  |
| 13 | 8  | 0 | -4.024372 | 0.722642  | 0.066386  |
| 14 | 8  | 0 | -1.321026 | -2.218509 | 0.282115  |
| 15 | 8  | 0 | -2.270496 | -0.045312 | -0.976336 |
| 16 | 1  | 0 | 1.435237  | -2.784121 | -0.858866 |
| 17 | 1  | 0 | -0.662903 | -0.929485 | 2.977273  |
| 18 | 1  | 0 | -0.453031 | 2.619499  | 1.530781  |
| 19 | 1  | 0 | -1.181403 | 1.968894  | -2.110130 |
| 20 | 1  | 0 | -0.969295 | -3.034112 | 0.674794  |
| 21 | 1  | 0 | 0.763352  | -0.783797 | -2.930100 |
| 22 | 1  | 0 | 0.256170  | 2.509110  | -1.767432 |
| 23 | 1  | 0 | 1.054949  | 2.296016  | 1.835781  |
| 24 | 1  | 0 | 0.890949  | -0.733609 | 2.963777  |
| 25 | 1  | 0 | -2.209159 | -2.409719 | -0.060910 |
| 26 | 1  | 0 | 2.213520  | -2.367264 | 0.434749  |
| 27 | 1  | 0 | -0.706994 | -1.304503 | -2.830935 |

Th·2NO<sub>3</sub>·3-4

| Center<br>Number | Atomic<br>Number | Atomic<br>Type | Coordinates (Angstroms) |   |   |
|------------------|------------------|----------------|-------------------------|---|---|
|                  |                  |                | X                       | Y | Z |



|    |    |   |           |           |           |
|----|----|---|-----------|-----------|-----------|
| 1  | 6  | 0 | 7.368975  | -5.629011 | -0.295799 |
| 2  | 7  | 0 | 6.626125  | -4.735782 | -1.157074 |
| 3  | 6  | 0 | 7.267957  | -4.389214 | -2.424921 |
| 4  | 6  | 0 | 8.737387  | -4.760209 | -2.386537 |
| 5  | 7  | 0 | 8.962761  | -6.236631 | -2.189975 |
| 6  | 6  | 0 | 8.011637  | -6.736260 | -1.112646 |
| 7  | 6  | 0 | 5.632558  | -3.946706 | -0.621095 |
| 8  | 6  | 0 | 4.702907  | -3.281992 | -1.468391 |
| 9  | 6  | 0 | 3.695169  | -2.503163 | -0.980998 |
| 10 | 6  | 0 | 3.527948  | -2.358247 | 0.408310  |
| 11 | 6  | 0 | 4.414597  | -3.028611 | 1.275099  |
| 12 | 6  | 0 | 5.458393  | -3.805681 | 0.757459  |
| 13 | 7  | 0 | 4.225240  | -2.904740 | 2.648356  |
| 14 | 6  | 0 | 3.179955  | -2.207798 | 3.125488  |
| 15 | 6  | 0 | 2.282633  | -1.523321 | 2.338263  |
| 16 | 6  | 0 | 2.431716  | -1.570001 | 0.913049  |
| 17 | 8  | 0 | 1.668173  | -0.972574 | 0.106772  |
| 18 | 90 | 0 | -0.608186 | -0.251402 | 0.085286  |
| 19 | 8  | 0 | -2.013385 | -1.177808 | -1.814036 |
| 20 | 7  | 0 | -1.041043 | -1.554759 | -2.553244 |
| 21 | 8  | 0 | -1.204715 | -2.197566 | -3.555559 |
| 22 | 6  | 0 | 5.090479  | -3.608116 | 3.574301  |
| 23 | 6  | 0 | 6.512706  | -3.152117 | 3.736653  |
| 24 | 6  | 0 | 5.521635  | -2.923799 | 4.835870  |
| 25 | 6  | 0 | 1.071305  | -0.900330 | 2.922137  |
| 26 | 8  | 0 | -0.024423 | -1.078199 | 2.323105  |
| 27 | 9  | 0 | 4.808251  | -3.461991 | -2.791039 |
| 28 | 6  | 0 | 8.662885  | -6.949019 | -3.501327 |
| 29 | 6  | 0 | 8.853073  | -8.452440 | -3.481235 |
| 30 | 6  | 0 | 10.411330 | -6.505907 | -1.826830 |
| 31 | 6  | 0 | 10.944881 | -5.792672 | -0.581288 |
| 32 | 6  | 0 | 11.833246 | -4.574386 | -0.859792 |
| 33 | 6  | 0 | 13.164348 | -4.938892 | -1.507633 |

|    |   |   |            |           |           |
|----|---|---|------------|-----------|-----------|
| 34 | 8 | 0 | -2.586804  | -1.117580 | 1.106487  |
| 35 | 6 | 0 | -3.341411  | -2.073872 | 0.764989  |
| 36 | 6 | 0 | -4.769579  | -1.885479 | 0.733256  |
| 37 | 6 | 0 | -5.632554  | -2.882551 | 0.236038  |
| 38 | 7 | 0 | -5.083361  | -4.089149 | -0.182144 |
| 39 | 6 | 0 | -3.758487  | -4.291826 | -0.098792 |
| 40 | 6 | 0 | -2.863191  | -3.372464 | 0.399774  |
| 41 | 6 | 0 | -5.309668  | -0.654628 | 1.144628  |
| 42 | 6 | 0 | -6.652488  | -0.443100 | 1.057183  |
| 43 | 6 | 0 | -7.550463  | -1.433296 | 0.578908  |
| 44 | 6 | 0 | -7.012593  | -2.647842 | 0.158964  |
| 45 | 7 | 0 | -8.892706  | -1.140172 | 0.449886  |
| 46 | 6 | 0 | -9.725997  | -1.912848 | -0.445782 |
| 47 | 6 | 0 | -11.083615 | -1.221592 | -0.598560 |
| 48 | 7 | 0 | -10.978160 | 0.277142  | -0.558037 |
| 49 | 6 | 0 | -10.429266 | 0.698148  | 0.798539  |
| 50 | 6 | 0 | -9.654320  | -0.432317 | 1.461765  |
| 51 | 6 | 0 | -10.038813 | 0.723653  | -1.671781 |
| 52 | 6 | 0 | -9.994231  | 2.215090  | -1.936062 |
| 53 | 6 | 0 | -12.338279 | 0.911817  | -0.782452 |
| 54 | 6 | 0 | -13.489808 | 0.381281  | 0.072281  |
| 55 | 6 | 0 | -14.359698 | -0.691803 | -0.585705 |
| 56 | 6 | 0 | -15.545230 | -1.070075 | 0.292621  |
| 57 | 9 | 0 | -7.148596  | 0.768132  | 1.358792  |
| 58 | 6 | 0 | -1.404151  | -3.631030 | 0.418129  |
| 59 | 8 | 0 | -0.621773  | -2.713252 | 0.077384  |
| 60 | 6 | 0 | -5.920235  | -5.101924 | -0.796214 |
| 61 | 6 | 0 | -5.683168  | -6.546012 | -0.474096 |
| 62 | 6 | 0 | -6.905154  | -5.857339 | 0.050293  |
| 63 | 7 | 0 | -0.895184  | -4.817395 | 0.772811  |
| 64 | 6 | 0 | -1.618752  | -5.899272 | 1.439906  |
| 65 | 6 | 0 | -1.703150  | -7.167721 | 0.604163  |
| 66 | 6 | 0 | 0.561974   | -4.977182 | 0.649906  |

|    |   |   |           |           |           |
|----|---|---|-----------|-----------|-----------|
| 67 | 6 | 0 | 1.029084  | -5.099996 | -0.792310 |
| 68 | 8 | 0 | 1.048102  | 1.333181  | 1.363190  |
| 69 | 7 | 0 | 0.155806  | 1.998235  | 1.970196  |
| 70 | 8 | 0 | -1.045503 | 1.708954  | 1.647709  |
| 71 | 8 | 0 | 0.136059  | 1.558501  | -1.277875 |
| 72 | 6 | 0 | -0.185261 | 2.784406  | -1.185815 |
| 73 | 6 | 0 | 0.790823  | 3.794312  | -0.886518 |
| 74 | 6 | 0 | 0.416058  | 5.150823  | -0.769794 |
| 75 | 7 | 0 | -0.912863 | 5.500160  | -0.973066 |
| 76 | 6 | 0 | -1.833961 | 4.551627  | -1.223051 |
| 77 | 6 | 0 | -1.531483 | 3.218864  | -1.353717 |
| 78 | 6 | 0 | 1.368166  | 6.115555  | -0.411743 |
| 79 | 6 | 0 | 2.691600  | 5.753829  | -0.176379 |
| 80 | 6 | 0 | 3.046954  | 4.388062  | -0.346493 |
| 81 | 6 | 0 | 2.133945  | 3.431369  | -0.671349 |
| 82 | 6 | 0 | -1.342764 | 6.875075  | -0.811205 |
| 83 | 6 | 0 | -0.900589 | 7.901393  | -1.814106 |
| 84 | 6 | 0 | -2.328105 | 7.449306  | -1.783448 |
| 85 | 6 | 0 | -2.572647 | 2.165133  | -1.482845 |
| 86 | 8 | 0 | -2.554635 | 1.219780  | -0.660818 |
| 87 | 9 | 0 | 4.337731  | 4.049799  | -0.205853 |
| 88 | 7 | 0 | 3.662972  | 6.687389  | 0.127026  |
| 89 | 6 | 0 | 3.416847  | 8.092132  | -0.120524 |
| 90 | 6 | 0 | 4.704166  | 8.885812  | 0.114287  |
| 91 | 7 | 0 | 5.937026  | 8.126220  | -0.286425 |
| 92 | 6 | 0 | 6.038234  | 6.862331  | 0.557323  |
| 93 | 6 | 0 | 4.686269  | 6.464633  | 1.132311  |
| 94 | 6 | 0 | 5.819271  | 7.765706  | -1.763127 |
| 95 | 6 | 0 | 7.076958  | 7.217697  | -2.406353 |
| 96 | 6 | 0 | 7.173353  | 8.983080  | -0.087481 |
| 97 | 6 | 0 | 7.321187  | 9.649420  | 1.282164  |
| 98 | 6 | 0 | 6.849453  | 11.105371 | 1.374837  |
| 99 | 6 | 0 | 7.680513  | 12.066453 | 0.532056  |

|     |   |   |           |           |           |
|-----|---|---|-----------|-----------|-----------|
| 100 | 7 | 0 | -3.497720 | 2.232184  | -2.446429 |
| 101 | 6 | 0 | -4.535998 | 1.195504  | -2.474588 |
| 102 | 6 | 0 | -5.705612 | 1.524406  | -1.558155 |
| 103 | 6 | 0 | -3.447865 | 3.158231  | -3.578840 |
| 104 | 6 | 0 | -4.609633 | 4.138657  | -3.622451 |
| 105 | 7 | 0 | 1.107649  | -0.222766 | 4.069480  |
| 106 | 6 | 0 | -0.177379 | 0.161728  | 4.680151  |
| 107 | 6 | 0 | -0.830438 | -1.004945 | 5.402632  |
| 108 | 6 | 0 | 2.311631  | 0.397961  | 4.626418  |
| 109 | 6 | 0 | 2.635230  | -0.065292 | 6.037212  |
| 110 | 8 | 0 | 0.416652  | 2.837840  | 2.797647  |
| 111 | 8 | 0 | 0.108796  | -1.202942 | -2.138078 |
| 112 | 1 | 0 | 1.060660  | 7.144273  | -0.283654 |
| 113 | 1 | 0 | 2.432129  | 2.395246  | -0.781033 |
| 114 | 1 | 0 | -2.853345 | 4.911584  | -1.297660 |
| 115 | 1 | 0 | 2.654673  | 8.520204  | 0.549740  |
| 116 | 1 | 0 | 3.059536  | 8.214424  | -1.148631 |
| 117 | 1 | 0 | 4.452431  | 7.035822  | 2.041964  |
| 118 | 1 | 0 | 4.728614  | 5.417324  | 1.422682  |
| 119 | 1 | 0 | 4.818250  | 9.136330  | 1.168990  |
| 120 | 1 | 0 | 4.687113  | 9.819026  | -0.452699 |
| 121 | 1 | 0 | 6.417599  | 6.075671  | -0.095100 |
| 122 | 1 | 0 | 6.764385  | 7.036215  | 1.352387  |
| 123 | 1 | 0 | 5.500537  | 8.683047  | -2.266911 |
| 124 | 1 | 0 | 5.010198  | 7.035325  | -1.818784 |
| 125 | 1 | 0 | 6.806302  | 6.898898  | -3.417254 |
| 126 | 1 | 0 | 7.868913  | 7.963186  | -2.503299 |
| 127 | 1 | 0 | 7.477494  | 6.338912  | -1.892182 |
| 128 | 1 | 0 | 8.010388  | 8.310673  | -0.283072 |
| 129 | 1 | 0 | 7.152867  | 9.728682  | -0.888177 |
| 130 | 1 | 0 | 8.390437  | 9.625321  | 1.523212  |
| 131 | 1 | 0 | 6.845340  | 9.044158  | 2.064559  |
| 132 | 1 | 0 | 5.790495  | 11.198259 | 1.104541  |

|     |   |   |           |           |           |
|-----|---|---|-----------|-----------|-----------|
| 133 | 1 | 0 | 6.913508  | 11.404353 | 2.427283  |
| 134 | 1 | 0 | 7.334181  | 13.095262 | 0.667715  |
| 135 | 1 | 0 | 8.737211  | 12.027986 | 0.819398  |
| 136 | 1 | 0 | 7.620019  | 11.848127 | -0.540837 |
| 137 | 1 | 0 | -1.418982 | 7.169197  | 0.232954  |
| 138 | 1 | 0 | -0.291639 | 7.554565  | -2.644031 |
| 139 | 1 | 0 | -0.652568 | 8.891531  | -1.443930 |
| 140 | 1 | 0 | -3.086759 | 8.113325  | -1.382406 |
| 141 | 1 | 0 | -2.662821 | 6.827694  | -2.609543 |
| 142 | 1 | 0 | -4.868599 | 1.105934  | -3.512566 |
| 143 | 1 | 0 | -4.070273 | 0.248792  | -2.189243 |
| 144 | 1 | 0 | -6.426459 | 0.699677  | -1.578929 |
| 145 | 1 | 0 | -5.367048 | 1.650270  | -0.526854 |
| 146 | 1 | 0 | -6.218069 | 2.440992  | -1.865596 |
| 147 | 1 | 0 | -3.438966 | 2.548937  | -4.490289 |
| 148 | 1 | 0 | -2.492688 | 3.684636  | -3.551805 |
| 149 | 1 | 0 | -4.484285 | 4.819035  | -4.470404 |
| 150 | 1 | 0 | -5.566346 | 3.625019  | -3.754830 |
| 151 | 1 | 0 | -4.674671 | 4.736575  | -2.706687 |
| 152 | 1 | 0 | 6.150902  | -4.275524 | 1.441822  |
| 153 | 1 | 0 | 2.990001  | -2.028844 | -1.656191 |
| 154 | 1 | 0 | 3.069357  | -2.235650 | 4.202732  |
| 155 | 1 | 0 | 7.228637  | -3.308852 | -2.589710 |
| 156 | 1 | 0 | 6.752141  | -4.852737 | -3.271784 |
| 157 | 1 | 0 | 8.105738  | -5.103607 | 0.330620  |
| 158 | 1 | 0 | 6.672790  | -6.130277 | 0.384795  |
| 159 | 1 | 0 | 9.230127  | -4.243649 | -1.563007 |
| 160 | 1 | 0 | 9.233701  | -4.471492 | -3.315876 |
| 161 | 1 | 0 | 7.220444  | -7.292823 | -1.617826 |
| 162 | 1 | 0 | 8.558533  | -7.422941 | -0.465052 |
| 163 | 1 | 0 | 9.312558  | -6.486499 | -4.249434 |
| 164 | 1 | 0 | 7.629792  | -6.697450 | -3.750628 |
| 165 | 1 | 0 | 8.470592  | -8.840105 | -4.429920 |

|     |   |   |            |           |           |
|-----|---|---|------------|-----------|-----------|
| 166 | 1 | 0 | 9.901794   | -8.749053 | -3.413102 |
| 167 | 1 | 0 | 8.289810   | -8.945857 | -2.683926 |
| 168 | 1 | 0 | 10.475526  | -7.588220 | -1.711278 |
| 169 | 1 | 0 | 10.990981  | -6.233898 | -2.714455 |
| 170 | 1 | 0 | 11.537302  | -6.525518 | -0.021745 |
| 171 | 1 | 0 | 10.125323  | -5.523573 | 0.094441  |
| 172 | 1 | 0 | 11.309026  | -3.841254 | -1.486945 |
| 173 | 1 | 0 | 12.022718  | -4.071903 | 0.095420  |
| 174 | 1 | 0 | 13.774246  | -4.044612 | -1.665639 |
| 175 | 1 | 0 | 13.734177  | -5.625973 | -0.872190 |
| 176 | 1 | 0 | 13.038777  | -5.418226 | -2.485994 |
| 177 | 1 | 0 | 4.882154   | -4.674642 | 3.614871  |
| 178 | 1 | 0 | 6.824061   | -2.282658 | 3.164705  |
| 179 | 1 | 0 | 7.274224   | -3.915459 | 3.863933  |
| 180 | 1 | 0 | 5.574515   | -3.532246 | 5.732752  |
| 181 | 1 | 0 | 5.205467   | -1.897999 | 5.004589  |
| 182 | 1 | 0 | 0.034368   | 0.985148  | 5.366156  |
| 183 | 1 | 0 | -0.839386  | 0.544403  | 3.900186  |
| 184 | 1 | 0 | -1.770312  | -0.677998 | 5.857881  |
| 185 | 1 | 0 | -1.057694  | -1.811162 | 4.699196  |
| 186 | 1 | 0 | -0.184845  | -1.399121 | 6.193750  |
| 187 | 1 | 0 | 2.135436   | 1.480354  | 4.607016  |
| 188 | 1 | 0 | 3.143112   | 0.214571  | 3.943656  |
| 189 | 1 | 0 | 3.527348   | 0.454312  | 6.399919  |
| 190 | 1 | 0 | 1.819274   | 0.156628  | 6.731898  |
| 191 | 1 | 0 | 2.823202   | -1.143825 | 6.085016  |
| 192 | 1 | 0 | -7.666713  | -3.426974 | -0.208240 |
| 193 | 1 | 0 | -4.644000  | 0.132566  | 1.481379  |
| 194 | 1 | 0 | -3.423352  | -5.244061 | -0.490033 |
| 195 | 1 | 0 | -9.924829  | -2.932086 | -0.078863 |
| 196 | 1 | 0 | -9.220318  | -2.003103 | -1.412913 |
| 197 | 1 | 0 | -10.327375 | -1.129514 | 1.980100  |
| 198 | 1 | 0 | -9.000410  | -0.007525 | 2.220230  |

|     |   |   |            |           |           |
|-----|---|---|------------|-----------|-----------|
| 199 | 1 | 0 | -11.759454 | -1.508993 | 0.207190  |
| 200 | 1 | 0 | -11.551033 | -1.499456 | -1.545546 |
| 201 | 1 | 0 | -9.777679  | 1.554600  | 0.624978  |
| 202 | 1 | 0 | -11.265000 | 1.016922  | 1.422799  |
| 203 | 1 | 0 | -10.364679 | 0.185896  | -2.567065 |
| 204 | 1 | 0 | -9.052182  | 0.358302  | -1.381570 |
| 205 | 1 | 0 | -9.204077  | 2.384942  | -2.673558 |
| 206 | 1 | 0 | -10.920734 | 2.604231  | -2.363068 |
| 207 | 1 | 0 | -9.737357  | 2.803859  | -1.050443 |
| 208 | 1 | 0 | -12.179172 | 1.975928  | -0.598469 |
| 209 | 1 | 0 | -12.558712 | 0.784956  | -1.847488 |
| 210 | 1 | 0 | -14.128341 | 1.244293  | 0.295008  |
| 211 | 1 | 0 | -13.136729 | 0.037218  | 1.054329  |
| 212 | 1 | 0 | -14.719979 | -0.309476 | -1.549577 |
| 213 | 1 | 0 | -13.777199 | -1.592547 | -0.814102 |
| 214 | 1 | 0 | -16.167898 | -1.824747 | -0.196590 |
| 215 | 1 | 0 | -15.214602 | -1.481168 | 1.253353  |
| 216 | 1 | 0 | -16.175944 | -0.198543 | 0.500920  |
| 217 | 1 | 0 | -6.203612  | -4.843852 | -1.813809 |
| 218 | 1 | 0 | -4.915413  | -6.798841 | 0.252057  |
| 219 | 1 | 0 | -5.781251  | -7.254545 | -1.290002 |
| 220 | 1 | 0 | -7.871155  | -6.089036 | -0.388093 |
| 221 | 1 | 0 | -6.925499  | -5.631306 | 1.112579  |
| 222 | 1 | 0 | -1.090105  | -6.107477 | 2.377608  |
| 223 | 1 | 0 | -2.608735  | -5.538278 | 1.724752  |
| 224 | 1 | 0 | -2.236088  | -7.944692 | 1.160824  |
| 225 | 1 | 0 | -2.224204  | -7.003533 | -0.345561 |
| 226 | 1 | 0 | -0.707764  | -7.555732 | 0.366563  |
| 227 | 1 | 0 | 0.826982   | -5.872461 | 1.218028  |
| 228 | 1 | 0 | 1.037260   | -4.119467 | 1.136327  |
| 229 | 1 | 0 | 2.115208   | -5.235421 | -0.813149 |
| 230 | 1 | 0 | 0.569434   | -5.962504 | -1.284737 |
| 231 | 1 | 0 | 0.788771   | -4.197566 | -1.360431 |

Th·2NO<sub>3</sub>·3-4'

| Center Number | Atomic Number | Atomic Type | Coordinates (Angstroms) |           |           |
|---------------|---------------|-------------|-------------------------|-----------|-----------|
|               |               |             | X                       | Y         | Z         |
| 1             | 6             | 0           | 3.720301                | 5.442818  | 0.694222  |
| 2             | 7             | 0           | 3.615743                | 5.200093  | -0.735378 |
| 3             | 6             | 0           | 3.703731                | 6.424685  | -1.507443 |
| 4             | 6             | 0           | 4.556608                | 7.451968  | -0.764143 |
| 5             | 7             | 0           | 5.701699                | 6.826127  | -0.023043 |
| 6             | 6             | 0           | 5.146091                | 5.863598  | 1.018908  |
| 7             | 6             | 0           | 2.908762                | 4.130723  | -1.257221 |
| 8             | 6             | 0           | 2.132364                | 4.257985  | -2.406966 |
| 9             | 6             | 0           | 1.440613                | 3.160399  | -2.935174 |
| 10            | 6             | 0           | 1.510619                | 1.904028  | -2.299446 |
| 11            | 6             | 0           | 2.324687                | 1.763933  | -1.161185 |
| 12            | 6             | 0           | 3.013182                | 2.836627  | -0.678902 |
| 13            | 7             | 0           | 0.632609                | 3.303202  | -4.056860 |
| 14            | 6             | 0           | -0.133580               | 2.279189  | -4.472488 |
| 15            | 6             | 0           | -0.125855               | 1.036513  | -3.889197 |
| 16            | 6             | 0           | 0.711587                | 0.792923  | -2.752092 |
| 17            | 8             | 0           | 0.738944                | -0.318871 | -2.152155 |
| 18            | 90            | 0           | -1.184084               | -1.439861 | -1.086863 |
| 19            | 8             | 0           | -2.736932               | -2.946070 | -2.495643 |
| 20            | 7             | 0           | -3.809619               | -2.336158 | -2.207283 |
| 21            | 8             | 0           | -4.874690               | -2.615949 | -2.693988 |
| 22            | 6             | 0           | 0.509535                | 4.587623  | -4.715874 |
| 23            | 6             | 0           | 0.485111                | 4.635322  | -6.213629 |
| 24            | 6             | 0           | 1.686619                | 5.134062  | -5.471322 |
| 25            | 6             | 0           | -1.125378               | -0.001292 | -4.226407 |
| 26            | 7             | 0           | -1.413311               | -0.359798 | -5.475958 |
| 27            | 6             | 0           | -0.658593               | 0.044601  | -6.660342 |
| 28            | 6             | 0           | -1.462036               | 0.910130  | -7.619142 |
| 29            | 9             | 0           | 3.829742                | 2.666684  | 0.373992  |



|    |   |   |           |           |           |
|----|---|---|-----------|-----------|-----------|
| 30 | 6 | 0 | 6.564778  | 6.073687  | -1.029130 |
| 31 | 6 | 0 | 7.905719  | 5.597279  | -0.510239 |
| 32 | 6 | 0 | 6.544411  | 7.893547  | 0.649341  |
| 33 | 6 | 0 | 5.787842  | 8.908540  | 1.509081  |
| 34 | 6 | 0 | 5.455007  | 10.243470 | 0.832361  |
| 35 | 6 | 0 | 6.687908  | 11.072622 | 0.490278  |
| 36 | 8 | 0 | 0.755977  | -2.320427 | 0.036871  |
| 37 | 8 | 0 | -0.041581 | 0.294362  | 0.430727  |
| 38 | 6 | 0 | 1.887398  | -2.704582 | -0.372292 |
| 39 | 6 | 0 | 3.086958  | -2.269493 | 0.295492  |
| 40 | 6 | 0 | 4.357206  | -2.733480 | -0.101845 |
| 41 | 7 | 0 | 4.443297  | -3.588003 | -1.196847 |
| 42 | 6 | 0 | 3.333490  | -3.953998 | -1.858490 |
| 43 | 6 | 0 | 2.058948  | -3.592882 | -1.485099 |
| 44 | 6 | 0 | 5.505350  | -2.342278 | 0.598000  |
| 45 | 6 | 0 | 5.418868  | -1.469520 | 1.683618  |
| 46 | 6 | 0 | 4.134211  | -0.945472 | 1.999434  |
| 47 | 6 | 0 | 3.000608  | -1.346983 | 1.355370  |
| 48 | 7 | 0 | 6.526503  | -1.082198 | 2.407477  |
| 49 | 6 | 0 | 7.840689  | -1.451549 | 1.927621  |
| 50 | 6 | 0 | 8.914003  | -0.641793 | 2.632921  |
| 51 | 7 | 0 | 8.925441  | -0.809579 | 4.144359  |
| 52 | 6 | 0 | 7.620062  | -1.429664 | 4.568930  |
| 53 | 6 | 0 | 6.424930  | -0.837279 | 3.847381  |
| 54 | 6 | 0 | 9.046627  | 0.556874  | 4.804189  |
| 55 | 6 | 0 | 10.316409 | 1.320344  | 4.484987  |
| 56 | 6 | 0 | 10.093560 | -1.660730 | 4.608215  |
| 57 | 6 | 0 | 10.111891 | -3.115360 | 4.130601  |
| 58 | 6 | 0 | 9.676804  | -4.150061 | 5.175056  |
| 59 | 6 | 0 | 10.659127 | -4.280661 | 6.333639  |
| 60 | 9 | 0 | 4.049868  | -0.015764 | 2.959323  |
| 61 | 6 | 0 | 5.738473  | -4.002823 | -1.698903 |
| 62 | 6 | 0 | 5.917164  | -5.399252 | -2.211600 |

|    |   |   |            |           |           |
|----|---|---|------------|-----------|-----------|
| 63 | 6 | 0 | 6.547594   | -4.996734 | -0.914272 |
| 64 | 6 | 0 | 0.863761   | -3.947821 | -2.284775 |
| 65 | 7 | 0 | 0.688670   | -5.149673 | -2.840041 |
| 66 | 6 | 0 | 1.492347   | -6.340932 | -2.574965 |
| 67 | 6 | 0 | 2.280324   | -6.821207 | -3.784564 |
| 68 | 8 | 0 | -0.014356  | -3.063912 | -2.455014 |
| 69 | 8 | 0 | -2.299002  | -1.029732 | 1.031777  |
| 70 | 6 | 0 | -3.360790  | -1.559127 | 1.465041  |
| 71 | 6 | 0 | -4.495431  | -0.748362 | 1.825404  |
| 72 | 6 | 0 | -5.692140  | -1.332988 | 2.286506  |
| 73 | 7 | 0 | -5.757411  | -2.717069 | 2.413376  |
| 74 | 6 | 0 | -4.708346  | -3.479737 | 2.063023  |
| 75 | 6 | 0 | -3.508476  | -2.973930 | 1.621528  |
| 76 | 6 | 0 | -6.797412  | -0.528605 | 2.596916  |
| 77 | 6 | 0 | -6.734031  | 0.853742  | 2.443370  |
| 78 | 6 | 0 | -5.529485  | 1.408644  | 1.935633  |
| 79 | 6 | 0 | -4.436699  | 0.646132  | 1.649509  |
| 80 | 6 | 0 | -6.992968  | -3.357420 | 2.818781  |
| 81 | 6 | 0 | -7.461819  | -3.215056 | 4.238722  |
| 82 | 6 | 0 | -6.938288  | -4.530328 | 3.749946  |
| 83 | 6 | 0 | -2.410627  | -3.836256 | 1.127850  |
| 84 | 7 | 0 | -2.021171  | -4.939404 | 1.771786  |
| 85 | 6 | 0 | -0.993846  | -5.766896 | 1.123789  |
| 86 | 6 | 0 | -1.545660  | -6.574262 | -0.041338 |
| 87 | 9 | 0 | -5.496511  | 2.728256  | 1.693952  |
| 88 | 7 | 0 | -7.825521  | 1.669158  | 2.674681  |
| 89 | 6 | 0 | -9.151999  | 1.096285  | 2.751649  |
| 90 | 6 | 0 | -10.190087 | 2.219126  | 2.809063  |
| 91 | 7 | 0 | -9.795897  | 3.415574  | 1.990490  |
| 92 | 6 | 0 | -8.499579  | 3.990442  | 2.546076  |
| 93 | 6 | 0 | -7.725421  | 2.951728  | 3.345905  |
| 94 | 6 | 0 | -9.598111  | 2.966865  | 0.546766  |
| 95 | 6 | 0 | -9.444357  | 4.080131  | -0.469606 |

|     |   |   |            |           |           |
|-----|---|---|------------|-----------|-----------|
| 96  | 6 | 0 | -10.886826 | 4.468327  | 2.032526  |
| 97  | 6 | 0 | -11.407724 | 4.855859  | 3.417144  |
| 98  | 6 | 0 | -12.686039 | 4.142942  | 3.862768  |
| 99  | 6 | 0 | -13.184500 | 4.668665  | 5.202539  |
| 100 | 8 | 0 | -1.845377  | -3.514971 | 0.051817  |
| 101 | 8 | 0 | -1.608221  | 1.026025  | -0.845311 |
| 102 | 7 | 0 | -0.767270  | 1.274668  | 0.088676  |
| 103 | 8 | 0 | -0.674067  | 2.366501  | 0.589902  |
| 104 | 8 | 0 | -1.735713  | -0.541352 | -3.268867 |
| 105 | 8 | 0 | -3.679467  | -1.390985 | -1.353486 |
| 106 | 6 | 0 | -2.411939  | -5.311848 | 3.131180  |
| 107 | 6 | 0 | -3.217323  | -6.600831 | 3.193195  |
| 108 | 6 | 0 | -2.503393  | -1.333803 | -5.662066 |
| 109 | 6 | 0 | -3.881583  | -0.711090 | -5.496814 |
| 110 | 6 | 0 | -0.495570  | -5.321475 | -3.700660 |
| 111 | 6 | 0 | -0.326678  | -4.666390 | -5.063063 |
| 112 | 1 | 0 | 2.025533   | 5.222155  | -2.883228 |
| 113 | 1 | 0 | 2.400379   | 0.799038  | -0.673522 |
| 114 | 1 | 0 | -0.795803  | 2.513865  | -5.297271 |
| 115 | 1 | 0 | 2.720984   | 6.895153  | -1.669811 |
| 116 | 1 | 0 | 4.127654   | 6.197670  | -2.491430 |
| 117 | 1 | 0 | 2.993657   | 6.206185  | 1.007210  |
| 118 | 1 | 0 | 3.493097   | 4.543499  | 1.261112  |
| 119 | 1 | 0 | 3.960642   | 7.991507  | -0.028182 |
| 120 | 1 | 0 | 4.968651   | 8.182913  | -1.463112 |
| 121 | 1 | 0 | 5.803931   | 4.994223  | 1.029252  |
| 122 | 1 | 0 | 5.193929   | 6.347406  | 1.995302  |
| 123 | 1 | 0 | 6.701998   | 6.757226  | -1.872319 |
| 124 | 1 | 0 | 5.956235   | 5.229125  | -1.358098 |
| 125 | 1 | 0 | 8.347156   | 4.967594  | -1.288104 |
| 126 | 1 | 0 | 8.604882   | 6.413704  | -0.318129 |
| 127 | 1 | 0 | 7.823098   | 4.982707  | 0.390604  |
| 128 | 1 | 0 | 7.266756   | 7.338933  | 1.250582  |

|     |   |   |           |           |           |
|-----|---|---|-----------|-----------|-----------|
| 129 | 1 | 0 | 7.094968  | 8.390821  | -0.155069 |
| 130 | 1 | 0 | 6.427632  | 9.118715  | 2.374224  |
| 131 | 1 | 0 | 4.880812  | 8.460685  | 1.935354  |
| 132 | 1 | 0 | 4.850000  | 10.091638 | -0.069954 |
| 133 | 1 | 0 | 4.820716  | 10.812035 | 1.521938  |
| 134 | 1 | 0 | 6.397172  | 12.031004 | 0.050113  |
| 135 | 1 | 0 | 7.281588  | 11.282084 | 1.387106  |
| 136 | 1 | 0 | 7.344254  | 10.574751 | -0.233429 |
| 137 | 1 | 0 | -0.124631 | 5.281686  | -4.169052 |
| 138 | 1 | 0 | 2.580699  | 4.518300  | -5.509522 |
| 139 | 1 | 0 | 1.866708  | 6.203437  | -5.417793 |
| 140 | 1 | 0 | -0.188697 | 5.350857  | -6.673365 |
| 141 | 1 | 0 | 0.598998  | 3.704327  | -6.762368 |
| 142 | 1 | 0 | -2.379670 | -1.753461 | -6.664193 |
| 143 | 1 | 0 | -2.364560 | -2.138763 | -4.934807 |
| 144 | 1 | 0 | -4.646452 | -1.485016 | -5.610540 |
| 145 | 1 | 0 | -3.992888 | -0.277791 | -4.499309 |
| 146 | 1 | 0 | -4.062999 | 0.068824  | -6.242677 |
| 147 | 1 | 0 | -0.339092 | -0.874531 | -7.165473 |
| 148 | 1 | 0 | 0.252770  | 0.549909  | -6.334416 |
| 149 | 1 | 0 | -0.843914 | 1.177710  | -8.481527 |
| 150 | 1 | 0 | -2.342645 | 0.380050  | -7.994361 |
| 151 | 1 | 0 | -1.810344 | 1.833829  | -7.143957 |
| 152 | 1 | 0 | 6.460304  | -2.756162 | 0.307172  |
| 153 | 1 | 0 | 2.035146  | -0.930809 | 1.626963  |
| 154 | 1 | 0 | 3.513945  | -4.550606 | -2.743545 |
| 155 | 1 | 0 | 5.544350  | -1.337978 | 4.257460  |
| 156 | 1 | 0 | 6.303640  | 0.229903  | 4.060384  |
| 157 | 1 | 0 | 8.031059  | -2.533024 | 2.007020  |
| 158 | 1 | 0 | 7.921179  | -1.191697 | 0.866579  |
| 159 | 1 | 0 | 7.684904  | -2.497717 | 4.361356  |
| 160 | 1 | 0 | 7.527201  | -1.296869 | 5.649361  |
| 161 | 1 | 0 | 8.736080  | 0.415600  | 2.431697  |

|     |   |   |           |           |           |
|-----|---|---|-----------|-----------|-----------|
| 162 | 1 | 0 | 9.902045  | -0.904033 | 2.252250  |
| 163 | 1 | 0 | 8.962028  | 0.379379  | 5.879783  |
| 164 | 1 | 0 | 8.168083  | 1.122937  | 4.486847  |
| 165 | 1 | 0 | 10.202097 | 2.327309  | 4.896648  |
| 166 | 1 | 0 | 11.203852 | 0.883780  | 4.947848  |
| 167 | 1 | 0 | 10.492449 | 1.431414  | 3.411198  |
| 168 | 1 | 0 | 10.981405 | -1.129467 | 4.264339  |
| 169 | 1 | 0 | 10.078642 | -1.606060 | 5.701248  |
| 170 | 1 | 0 | 11.142931 | -3.341888 | 3.836009  |
| 171 | 1 | 0 | 9.528547  | -3.229963 | 3.210582  |
| 172 | 1 | 0 | 8.677334  | -3.917791 | 5.565919  |
| 173 | 1 | 0 | 9.584564  | -5.118173 | 4.670059  |
| 174 | 1 | 0 | 10.320847 | -5.041983 | 7.042584  |
| 175 | 1 | 0 | 11.651676 | -4.573993 | 5.973945  |
| 176 | 1 | 0 | 10.772896 | -3.346187 | 6.896185  |
| 177 | 1 | 0 | 6.262595  | -3.198295 | -2.209256 |
| 178 | 1 | 0 | 6.102220  | -5.394669 | -0.006899 |
| 179 | 1 | 0 | 7.622758  | -4.850932 | -0.873788 |
| 180 | 1 | 0 | 6.542608  | -5.524375 | -3.089349 |
| 181 | 1 | 0 | 5.079053  | -6.088351 | -2.154364 |
| 182 | 1 | 0 | -0.653368 | -6.398254 | -3.803905 |
| 183 | 1 | 0 | -1.359732 | -4.896199 | -3.182898 |
| 184 | 1 | 0 | -1.231090 | -4.826525 | -5.658227 |
| 185 | 1 | 0 | -0.175974 | -3.588954 | -4.952513 |
| 186 | 1 | 0 | 0.522415  | -5.085773 | -5.611297 |
| 187 | 1 | 0 | 0.799236  | -7.127095 | -2.253793 |
| 188 | 1 | 0 | 2.144425  | -6.141786 | -1.722110 |
| 189 | 1 | 0 | 2.854063  | -7.715188 | -3.521630 |
| 190 | 1 | 0 | 1.615370  | -7.087108 | -4.611733 |
| 191 | 1 | 0 | 2.975645  | -6.059825 | -4.154939 |
| 192 | 1 | 0 | -7.700524 | -0.987493 | 2.975414  |
| 193 | 1 | 0 | -3.543082 | 1.100925  | 1.235826  |
| 194 | 1 | 0 | -4.882723 | -4.546709 | 2.127982  |

|     |   |   |            |           |           |
|-----|---|---|------------|-----------|-----------|
| 195 | 1 | 0 | -9.303606  | 0.477932  | 3.650792  |
| 196 | 1 | 0 | -9.313262  | 0.454951  | 1.878640  |
| 197 | 1 | 0 | -8.105848  | 2.871686  | 4.374285  |
| 198 | 1 | 0 | -6.689474  | 3.275035  | 3.419563  |
| 199 | 1 | 0 | -10.325845 | 2.570935  | 3.831970  |
| 200 | 1 | 0 | -11.156794 | 1.866509  | 2.443365  |
| 201 | 1 | 0 | -7.910948  | 4.326820  | 1.692332  |
| 202 | 1 | 0 | -8.744504  | 4.855429  | 3.163853  |
| 203 | 1 | 0 | -10.468120 | 2.347991  | 0.307780  |
| 204 | 1 | 0 | -8.709180  | 2.333802  | 0.560012  |
| 205 | 1 | 0 | -9.193911  | 3.608945  | -1.424631 |
| 206 | 1 | 0 | -10.362244 | 4.651828  | -0.621656 |
| 207 | 1 | 0 | -8.630222  | 4.771744  | -0.232796 |
| 208 | 1 | 0 | -10.455665 | 5.333407  | 1.525657  |
| 209 | 1 | 0 | -11.700531 | 4.085664  | 1.407706  |
| 210 | 1 | 0 | -11.616042 | 5.931559  | 3.378067  |
| 211 | 1 | 0 | -10.627130 | 4.752345  | 4.183521  |
| 212 | 1 | 0 | -13.456995 | 4.292170  | 3.095684  |
| 213 | 1 | 0 | -12.533267 | 3.059116  | 3.933248  |
| 214 | 1 | 0 | -14.108403 | 4.164475  | 5.500574  |
| 215 | 1 | 0 | -12.444485 | 4.506071  | 5.994628  |
| 216 | 1 | 0 | -13.390181 | 5.743875  | 5.152758  |
| 217 | 1 | 0 | -7.737830  | -3.365421 | 2.026549  |
| 218 | 1 | 0 | -5.971362  | -4.844841 | 4.133248  |
| 219 | 1 | 0 | -7.633677  | -5.341729 | 3.561688  |
| 220 | 1 | 0 | -8.528421  | -3.101186 | 4.407268  |
| 221 | 1 | 0 | -6.827045  | -2.652775 | 4.917597  |
| 222 | 1 | 0 | -1.487628  | -5.420925 | 3.710554  |
| 223 | 1 | 0 | -2.955499  | -4.477588 | 3.578081  |
| 224 | 1 | 0 | -3.470531  | -6.829078 | 4.233048  |
| 225 | 1 | 0 | -4.147498  | -6.533897 | 2.618155  |
| 226 | 1 | 0 | -2.647944  | -7.448276 | 2.799034  |
| 227 | 1 | 0 | -0.587132  | -6.426226 | 1.894684  |

|     |   |   |           |           |           |
|-----|---|---|-----------|-----------|-----------|
| 228 | 1 | 0 | -0.189096 | -5.104357 | 0.790823  |
| 229 | 1 | 0 | -0.754504 | -7.205672 | -0.458244 |
| 230 | 1 | 0 | -2.360874 | -7.229749 | 0.279429  |
| 231 | 1 | 0 | -1.917561 | -5.913267 | -0.828982 |

Th·2NO<sub>3</sub>·3-4''

| Center Number | Atomic Number | Atomic Type | Coordinates (Angstroms) |           |           |
|---------------|---------------|-------------|-------------------------|-----------|-----------|
|               |               |             | X                       | Y         | Z         |
| 1             | 6             | 0           | 9.289006                | -1.508884 | 2.391884  |
| 2             | 7             | 0           | 8.075135                | -2.139454 | 1.923833  |
| 3             | 6             | 0           | 8.092918                | -3.600683 | 1.868170  |
| 4             | 6             | 0           | 9.515383                | -4.111123 | 1.989613  |
| 5             | 7             | 0           | 10.166094               | -3.725168 | 3.292329  |
| 6             | 6             | 0           | 9.847604                | -2.266053 | 3.583943  |
| 7             | 6             | 0           | 7.174064                | -1.408881 | 1.180023  |
| 8             | 6             | 0           | 5.854470                | -1.893294 | 0.968647  |
| 9             | 6             | 0           | 4.923972                | -1.192898 | 0.260153  |
| 10            | 6             | 0           | 5.246420                | 0.069331  | -0.269304 |
| 11            | 6             | 0           | 6.540305                | 0.587105  | -0.056598 |
| 12            | 6             | 0           | 7.490957                | -0.155357 | 0.653645  |
| 13            | 7             | 0           | 6.845945                | 1.849996  | -0.556085 |
| 14            | 6             | 0           | 5.905926                | 2.575416  | -1.183704 |
| 15            | 6             | 0           | 4.628056                | 2.128631  | -1.427124 |
| 16            | 6             | 0           | 4.235961                | 0.834293  | -0.951264 |
| 17            | 8             | 0           | 3.070562                | 0.368329  | -1.107769 |
| 18            | 90            | 0           | 0.946261                | 1.394120  | -0.466213 |
| 19            | 8             | 0           | -1.415239               | 1.037420  | -1.479016 |
| 20            | 7             | 0           | -1.568380               | 2.236381  | -1.865379 |
| 21            | 8             | 0           | -2.550428               | 2.614228  | -2.448927 |
| 22            | 6             | 0           | 8.143383                | 2.443264  | -0.300447 |
| 23            | 6             | 0           | 9.353118                | 1.891734  | -0.999190 |
| 24            | 6             | 0           | 8.813166                | 3.235266  | -1.381992 |

|    |   |   |           |           |           |
|----|---|---|-----------|-----------|-----------|
| 25 | 6 | 0 | 3.575733  | 3.004305  | -1.989654 |
| 26 | 8 | 0 | 2.452767  | 3.009216  | -1.422935 |
| 27 | 9 | 0 | 5.512564  | -3.064235 | 1.519466  |
| 28 | 6 | 0 | 9.591511  | -4.601071 | 4.396400  |
| 29 | 6 | 0 | 10.152107 | -4.350899 | 5.782071  |
| 30 | 6 | 0 | 11.662417 | -3.968021 | 3.226278  |
| 31 | 6 | 0 | 12.422050 | -3.240628 | 2.113286  |
| 32 | 6 | 0 | 12.796229 | -4.105430 | 0.903757  |
| 33 | 6 | 0 | 13.826548 | -5.180536 | 1.230719  |
| 34 | 8 | 0 | 0.446926  | -0.896720 | -0.904124 |
| 35 | 6 | 0 | -0.171017 | -1.485957 | -1.834078 |
| 36 | 6 | 0 | -1.133417 | -2.510586 | -1.520319 |
| 37 | 6 | 0 | -1.872497 | -3.158262 | -2.530023 |
| 38 | 7 | 0 | -1.644471 | -2.801243 | -3.854139 |
| 39 | 6 | 0 | -0.742803 | -1.850174 | -4.151627 |
| 40 | 6 | 0 | 0.034499  | -1.202918 | -3.219265 |
| 41 | 6 | 0 | -1.377196 | -2.837163 | -0.174408 |
| 42 | 6 | 0 | -2.318939 | -3.772989 | 0.133180  |
| 43 | 6 | 0 | -3.049624 | -4.475259 | -0.862633 |
| 44 | 6 | 0 | -2.817112 | -4.137393 | -2.194897 |
| 45 | 7 | 0 | -4.018060 | -5.387920 | -0.510985 |
| 46 | 6 | 0 | -5.144380 | -5.656830 | -1.376728 |
| 47 | 6 | 0 | -6.305540 | -6.199500 | -0.536358 |
| 48 | 7 | 0 | -6.359485 | -5.576586 | 0.832601  |
| 49 | 6 | 0 | -5.091568 | -5.942229 | 1.593774  |
| 50 | 6 | 0 | -3.950833 | -6.267984 | 0.635872  |
| 51 | 6 | 0 | -6.462365 | -4.067051 | 0.667094  |
| 52 | 6 | 0 | -6.773734 | -3.281995 | 1.926426  |
| 53 | 6 | 0 | -7.576522 | -6.068772 | 1.594088  |
| 54 | 6 | 0 | -7.794497 | -7.581713 | 1.633389  |
| 55 | 6 | 0 | -8.753507 | -8.138946 | 0.579365  |
| 56 | 6 | 0 | -8.997621 | -9.629561 | 0.776027  |
| 57 | 9 | 0 | -2.610961 | -4.013223 | 1.423395  |



|    |   |   |           |           |           |
|----|---|---|-----------|-----------|-----------|
| 58 | 6 | 0 | 0.965310  | -0.113005 | -3.601658 |
| 59 | 8 | 0 | 0.988090  | 0.941142  | -2.920629 |
| 60 | 6 | 0 | -2.441788 | -3.381651 | -4.916708 |
| 61 | 6 | 0 | -1.783005 | -3.747862 | -6.211911 |
| 62 | 6 | 0 | -2.242053 | -4.825892 | -5.279580 |
| 63 | 7 | 0 | 1.756610  | -0.227421 | -4.676479 |
| 64 | 6 | 0 | 2.054250  | -1.468920 | -5.392912 |
| 65 | 6 | 0 | 1.611427  | -1.448645 | -6.848123 |
| 66 | 6 | 0 | 2.535910  | 0.953402  | -5.066401 |
| 67 | 6 | 0 | 1.685001  | 2.002813  | -5.765004 |
| 68 | 8 | 0 | 2.706865  | 1.643627  | 1.374888  |
| 69 | 7 | 0 | 2.531863  | 0.499297  | 1.913339  |
| 70 | 8 | 0 | 1.589259  | -0.187222 | 1.404660  |
| 71 | 8 | 0 | -0.830380 | 1.473870  | 1.185989  |
| 72 | 6 | 0 | -1.616299 | 2.431258  | 1.455540  |
| 73 | 6 | 0 | -3.047454 | 2.284204  | 1.357675  |
| 74 | 6 | 0 | -3.907562 | 3.370341  | 1.628779  |
| 75 | 7 | 0 | -3.363401 | 4.584089  | 2.025134  |
| 76 | 6 | 0 | -2.028996 | 4.731191  | 2.100186  |
| 77 | 6 | 0 | -1.138531 | 3.716228  | 1.857312  |
| 78 | 6 | 0 | -5.291464 | 3.236107  | 1.456599  |
| 79 | 6 | 0 | -5.852072 | 2.031460  | 1.043969  |
| 80 | 6 | 0 | -4.966258 | 0.939362  | 0.841043  |
| 81 | 6 | 0 | -3.613155 | 1.057570  | 0.960439  |
| 82 | 6 | 0 | -4.213830 | 5.734929  | 2.258053  |
| 83 | 6 | 0 | -5.122658 | 5.744052  | 3.454027  |
| 84 | 6 | 0 | -3.918679 | 6.633890  | 3.420207  |
| 85 | 6 | 0 | 0.325364  | 3.949752  | 1.791357  |
| 86 | 8 | 0 | 0.922253  | 3.560703  | 0.760136  |
| 87 | 9 | 0 | -5.494062 | -0.265281 | 0.533935  |
| 88 | 7 | 0 | -7.223591 | 1.875394  | 0.913338  |
| 89 | 6 | 0 | -8.086569 | 2.941554  | 1.390173  |
| 90 | 6 | 0 | -9.552985 | 2.578400  | 1.158904  |

|     |   |   |            |           |           |
|-----|---|---|------------|-----------|-----------|
| 91  | 7 | 0 | -9.818683  | 1.111656  | 1.329935  |
| 92  | 6 | 0 | -9.005040  | 0.349314  | 0.296169  |
| 93  | 6 | 0 | -7.815267  | 1.158507  | -0.204651 |
| 94  | 6 | 0 | -9.397862  | 0.713046  | 2.739542  |
| 95  | 6 | 0 | -9.810935  | -0.675896 | 3.180488  |
| 96  | 6 | 0 | -11.296824 | 0.812876  | 1.153730  |
| 97  | 6 | 0 | -11.957934 | 1.382913  | -0.102715 |
| 98  | 6 | 0 | -12.700046 | 2.713133  | 0.073002  |
| 99  | 6 | 0 | -13.916744 | 2.612156  | 0.986228  |
| 100 | 7 | 0 | 0.986335   | 4.560178  | 2.775417  |
| 101 | 6 | 0 | 2.425356   | 4.801577  | 2.582388  |
| 102 | 6 | 0 | 2.698605   | 5.977556  | 1.658530  |
| 103 | 6 | 0 | 0.426789   | 4.881688  | 4.087409  |
| 104 | 6 | 0 | 0.354255   | 6.376242  | 4.361050  |
| 105 | 7 | 0 | 3.772713   | 3.786196  | -3.052931 |
| 106 | 6 | 0 | 2.666670   | 4.674238  | -3.452164 |
| 107 | 6 | 0 | 2.520160   | 5.880812  | -2.539926 |
| 108 | 6 | 0 | 4.941179   | 3.742670  | -3.930395 |
| 109 | 6 | 0 | 5.770054   | 5.017327  | -3.894339 |
| 110 | 8 | 0 | 3.213640   | 0.100606  | 2.820780  |
| 111 | 8 | 0 | -0.601559  | 3.022518  | -1.573784 |
| 112 | 1 | 0 | -5.922094  | 4.096765  | 1.625545  |
| 113 | 1 | 0 | -2.965265  | 0.210431  | 0.766429  |
| 114 | 1 | 0 | -1.692408  | 5.730619  | 2.348540  |
| 115 | 1 | 0 | -7.916155  | 3.891443  | 0.859518  |
| 116 | 1 | 0 | -7.885268  | 3.114184  | 2.452619  |
| 117 | 1 | 0 | -8.115458  | 1.860114  | -0.996087 |
| 118 | 1 | 0 | -7.098036  | 0.473938  | -0.650850 |
| 119 | 1 | 0 | -9.863884  | 2.838745  | 0.147064  |
| 120 | 1 | 0 | -10.194631 | 3.120350  | 1.856899  |
| 121 | 1 | 0 | -8.671077  | -0.570128 | 0.777878  |
| 122 | 1 | 0 | -9.664057  | 0.085703  | -0.531968 |
| 123 | 1 | 0 | -9.832993  | 1.466799  | 3.402037  |

|     |   |   |            |           |           |
|-----|---|---|------------|-----------|-----------|
| 124 | 1 | 0 | -8.311375  | 0.816448  | 2.757760  |
| 125 | 1 | 0 | -9.351504  | -0.852007 | 4.157559  |
| 126 | 1 | 0 | -10.889720 | -0.785964 | 3.306621  |
| 127 | 1 | 0 | -9.453308  | -1.463195 | 2.510009  |
| 128 | 1 | 0 | -11.362434 | -0.276488 | 1.165342  |
| 129 | 1 | 0 | -11.786163 | 1.184677  | 2.059039  |
| 130 | 1 | 0 | -12.685134 | 0.632303  | -0.433846 |
| 131 | 1 | 0 | -11.236635 | 1.454504  | -0.927189 |
| 132 | 1 | 0 | -12.028203 | 3.499425  | 0.438205  |
| 133 | 1 | 0 | -13.024274 | 3.040125  | -0.921434 |
| 134 | 1 | 0 | -14.437165 | 3.572809  | 1.040443  |
| 135 | 1 | 0 | -14.627667 | 1.866553  | 0.613069  |
| 136 | 1 | 0 | -13.652612 | 2.334295  | 2.013616  |
| 137 | 1 | 0 | -4.565875  | 6.188904  | 1.334648  |
| 138 | 1 | 0 | -5.081016  | 4.884383  | 4.116710  |
| 139 | 1 | 0 | -6.107498  | 6.185346  | 3.334134  |
| 140 | 1 | 0 | -4.050701  | 7.699514  | 3.264472  |
| 141 | 1 | 0 | -3.097555  | 6.372454  | 4.082144  |
| 142 | 1 | 0 | 2.847773   | 4.980342  | 3.574892  |
| 143 | 1 | 0 | 2.866604   | 3.882043  | 2.188903  |
| 144 | 1 | 0 | 3.778521   | 6.120333  | 1.552377  |
| 145 | 1 | 0 | 2.278859   | 5.788254  | 0.667666  |
| 146 | 1 | 0 | 2.269981   | 6.906054  | 2.048057  |
| 147 | 1 | 0 | 1.064279   | 4.395244  | 4.834922  |
| 148 | 1 | 0 | -0.556245  | 4.414853  | 4.171739  |
| 149 | 1 | 0 | -0.068310  | 6.549715  | 5.355529  |
| 150 | 1 | 0 | 1.346628   | 6.836658  | 4.338564  |
| 151 | 1 | 0 | -0.268427  | 6.897550  | 3.625538  |
| 152 | 1 | 0 | 8.488319   | 0.244484  | 0.771641  |
| 153 | 1 | 0 | 3.917677   | -1.581964 | 0.145241  |
| 154 | 1 | 0 | 6.219208   | 3.572821  | -1.467112 |
| 155 | 1 | 0 | 7.722195   | -3.950516 | 0.900189  |
| 156 | 1 | 0 | 7.437235   | -4.036419 | 2.628581  |

|     |   |   |           |           |           |
|-----|---|---|-----------|-----------|-----------|
| 157 | 1 | 0 | 10.041082 | -1.384502 | 1.597541  |
| 158 | 1 | 0 | 9.049606  | -0.506926 | 2.763313  |
| 159 | 1 | 0 | 10.128170 | -3.700353 | 1.187542  |
| 160 | 1 | 0 | 9.543962  | -5.200791 | 1.916852  |
| 161 | 1 | 0 | 9.098898  | -2.254374 | 4.377869  |
| 162 | 1 | 0 | 10.754040 | -1.785844 | 3.955314  |
| 163 | 1 | 0 | 9.773609  | -5.633590 | 4.085735  |
| 164 | 1 | 0 | 8.512852  | -4.430619 | 4.384018  |
| 165 | 1 | 0 | 9.555394  | -4.940461 | 6.484152  |
| 166 | 1 | 0 | 11.188519 | -4.677816 | 5.888918  |
| 167 | 1 | 0 | 10.073236 | -3.305657 | 6.094612  |
| 168 | 1 | 0 | 12.038089 | -3.673525 | 4.206502  |
| 169 | 1 | 0 | 11.779879 | -5.052786 | 3.140200  |
| 170 | 1 | 0 | 13.348453 | -2.858187 | 2.556899  |
| 171 | 1 | 0 | 11.877777 | -2.345497 | 1.791744  |
| 172 | 1 | 0 | 11.905713 | -4.573025 | 0.463525  |
| 173 | 1 | 0 | 13.200506 | -3.442469 | 0.130561  |
| 174 | 1 | 0 | 14.082302 | -5.754777 | 0.335442  |
| 175 | 1 | 0 | 14.749156 | -4.734225 | 1.618297  |
| 176 | 1 | 0 | 13.464366 | -5.896521 | 1.978206  |
| 177 | 1 | 0 | 8.250146  | 2.784323  | 0.726653  |
| 178 | 1 | 0 | 9.193800  | 1.077957  | -1.700718 |
| 179 | 1 | 0 | 10.278730 | 1.836559  | -0.434361 |
| 180 | 1 | 0 | 9.348974  | 4.128785  | -1.078831 |
| 181 | 1 | 0 | 8.326034  | 3.308576  | -2.350534 |
| 182 | 1 | 0 | 2.872220  | 4.984343  | -4.480121 |
| 183 | 1 | 0 | 1.744454  | 4.086400  | -3.451286 |
| 184 | 1 | 0 | 1.712972  | 6.520799  | -2.908744 |
| 185 | 1 | 0 | 2.261864  | 5.560291  | -1.528153 |
| 186 | 1 | 0 | 3.439508  | 6.473411  | -2.504235 |
| 187 | 1 | 0 | 4.570017  | 3.571719  | -4.948274 |
| 188 | 1 | 0 | 5.540377  | 2.867824  | -3.670655 |
| 189 | 1 | 0 | 6.620580  | 4.924658  | -4.576432 |

|     |   |   |           |            |           |
|-----|---|---|-----------|------------|-----------|
| 190 | 1 | 0 | 5.183513  | 5.884559   | -4.212205 |
| 191 | 1 | 0 | 6.153659  | 5.228938   | -2.890324 |
| 192 | 1 | 0 | -3.349852 | -4.659610  | -2.978525 |
| 193 | 1 | 0 | -0.835916 | -2.316178  | 0.608923  |
| 194 | 1 | 0 | -0.680883 | -1.600967  | -5.203604 |
| 195 | 1 | 0 | -4.923586 | -6.403592  | -2.154232 |
| 196 | 1 | 0 | -5.433572 | -4.730410  | -1.883302 |
| 197 | 1 | 0 | -4.005359 | -7.310127  | 0.294872  |
| 198 | 1 | 0 | -3.003981 | -6.162963  | 1.160770  |
| 199 | 1 | 0 | -6.214058 | -7.275488  | -0.386024 |
| 200 | 1 | 0 | -7.260615 | -6.008406  | -1.030241 |
| 201 | 1 | 0 | -4.834960 | -5.084897  | 2.215705  |
| 202 | 1 | 0 | -5.315728 | -6.789984  | 2.242367  |
| 203 | 1 | 0 | -7.237418 | -3.907276  | -0.088040 |
| 204 | 1 | 0 | -5.504214 | -3.747778  | 0.256099  |
| 205 | 1 | 0 | -6.633178 | -2.223575  | 1.683200  |
| 206 | 1 | 0 | -7.799533 | -3.423053  | 2.275045  |
| 207 | 1 | 0 | -6.092046 | -3.501832  | 2.753203  |
| 208 | 1 | 0 | -7.450178 | -5.670650  | 2.602924  |
| 209 | 1 | 0 | -8.438881 | -5.570199  | 1.139593  |
| 210 | 1 | 0 | -8.212877 | -7.803307  | 2.622294  |
| 211 | 1 | 0 | -6.840847 | -8.126564  | 1.607668  |
| 212 | 1 | 0 | -9.705039 | -7.595801  | 0.647265  |
| 213 | 1 | 0 | -8.375429 | -7.965846  | -0.435376 |
| 214 | 1 | 0 | -9.698337 | -10.011538 | 0.027994  |
| 215 | 1 | 0 | -8.067109 | -10.201547 | 0.685187  |
| 216 | 1 | 0 | -9.420235 | -9.833027  | 1.766315  |
| 217 | 1 | 0 | -3.449257 | -2.973945  | -4.951336 |
| 218 | 1 | 0 | -0.709622 | -3.608723  | -6.307320 |
| 219 | 1 | 0 | -2.344026 | -3.556924  | -7.120815 |
| 220 | 1 | 0 | -3.123070 | -5.406515  | -5.535766 |
| 221 | 1 | 0 | -1.472773 | -5.372071  | -4.741042 |
| 222 | 1 | 0 | 3.139563  | -1.615750  | -5.338172 |

|     |   |   |          |           |           |
|-----|---|---|----------|-----------|-----------|
| 223 | 1 | 0 | 1.607605 | -2.303192 | -4.849915 |
| 224 | 1 | 0 | 1.869318 | -2.399100 | -7.325356 |
| 225 | 1 | 0 | 0.531890 | -1.292700 | -6.950693 |
| 226 | 1 | 0 | 2.111787 | -0.653567 | -7.409404 |
| 227 | 1 | 0 | 3.336949 | 0.603229  | -5.722602 |
| 228 | 1 | 0 | 2.997397 | 1.364638  | -4.164735 |
| 229 | 1 | 0 | 2.304104 | 2.859745  | -6.049958 |
| 230 | 1 | 0 | 1.230384 | 1.601749  | -6.675713 |
| 231 | 1 | 0 | 0.889481 | 2.358386  | -5.104591 |

## 8. References

<sup>1</sup> Gaussian 16, Revision B.01, Frisch, M. J.; Trucks, G. W.; Schlegel, H. B.; Scuseria, G. E.; Robb, M. A.; Cheeseman, J. R.; Scalmani, G.; Barone, V.; Petersson, G. A.; Nakatsuji, H.; Li, X.; Caricato, M.; Marenich, A. V.; Bloino, J.; Janesko, B. G.; Gomperts, R.; Mennucci, B.; Hratchian, H. P.; Ortiz, J. V.; Izmaylov, A. F.; Sonnenberg, J. L.; Williams-Young, D.; Ding, F.; Lipparini, F.; Egidi, F.; Goings, J.; Peng, B.; Petrone, A.; Henderson, T.; Ranasinghe, D.; Zakrzewski, V. G.; Gao, J.; Rega, N.; Zheng, G.; Liang, W.; Hada, M.; Ehara, M.; Toyota, K.; Fukuda, R.; Hasegawa, J.; Ishida, M.; Nakajima, T.; Honda, Y.; Kitao, O.; Nakai, H.; Vreven, T.; Throssell, K.; Montgomery, J. A., Jr.; Peralta, J. E.; Ogliaro, F.; Bearpark, M. J.; Heyd, J. J.; Brothers, E. N.; Kudin, K. N.; Staroverov, V. N.; Keith, T. A.; Kobayashi, R.; Normand, J.; Raghavachari, K.; Rendell, A. P.; Burant, J. C.; Iyengar, S. S.; Tomasi, J.; Cossi, M.; Millam, J. M.; Klene, M.; Adamo, C.; Cammi, R.; Ochterski, J. W.; Martin, R. L.; Morokuma, K.; Farkas, O.; Foresman, J. B.; Fox, D. J. Gaussian, Inc., Wallingford CT, 2016.

<sup>2</sup> Density-Functional Theory of Atoms and Molecules, Parr, R. G.; Yang, W. 1989, Oxford, New York.

<sup>3</sup> Adamo, C.; Barone, V. *J. Chem. Phys.* **1999**, *110*, 6158–6159.

<sup>4</sup> Modern Theoretical Chemistry Vol. 3, Dunning, T. H. Jr.; Hay, P. J. in , Ed. Schaefer III, H. F. 1977, Plenum, New York.

<sup>5</sup> Grimme, S.; Antony, J.; Ehrlich, S.; Krieg, H. J. *Chem. Phys.* **2010**, *132*, 154104.
